# Supplementary material
Source: PubMed Central journal article supplement (PMC11072921)
Supplement: 18_2022_4149_MOESM1_ESM.pdf [file 18_2022_4149_MOESM1_ESM.pdf]

## Met-HER3 crosstalk supports proliferation via MPZL3 in *MET*-amplified cancer cells

Yaakov E. Stern, Abdulhameed Al-Ghabkari, Anie Monast, Benoit Fiset, Farzaneh Aboualizadeh, Zhong Yao, Igor Stagljar, Logan A. Walsh, Stephanie Duhamel, Morag Park

### Supplementary material

#### Supplementary Table 1: Antibodies

| Antibody                 | Supplier          | Catalogue number | Dilution |
|--------------------------|-------------------|------------------|----------|
| pMET Y1234/5 (D26) XP    | Cell Signaling    | 3077             | 1:1000   |
| MET                      | In-house          | 148              | 1:1000   |
| pAKT S473 (D7F10) XP     | Cell Signaling    | 9018             | 1:2000   |
| AKT (40D4)               | Cell Signaling    | 2920             | 1:1000   |
| pERK1/2 T202/Y204        | Cell Signaling    | 9101             | 1:2000   |
| ERK1/2 (3A7)             | Cell Signaling    | 9107             | 1:1000   |
| pHER2 (Y1221/1222)       | Cell Signaling    | 2243             | 1:1000   |
| HER2                     | Cell Signaling    | 2165             | 1:1000   |
| pHER3(Y1289)             | Cell Signaling    | 4791             | 1:500    |
| pHER3 (Y1222)            | Cell Signaling    | 4784             | 1:1000   |
| HER3 (D22C5) XP          | Cell Signaling    | 12708            | 1:1000   |
| pSTAT3(Y705)             | Cell Signaling    | 9145             | 1:1000   |
| STAT3                    | Cell Signaling    | 8768             | 1:1000   |
| pEGFR(Y1173)             | Santa Cruz        | 4407             | 1:1000   |
| EGFR                     | Cell Signaling    | 4267             | 1:1000   |
| pY100                    | Cell Signaling    | 9411             | 1:1000   |
| MPZL3                    | ProteinTech       | 25513-1-AP       | 1:1000   |
| Beta-Actin (AC-15)       | Sigma             | A5441            | 1:4000   |
| M2-flag                  | Sigma             | F3165            | 1:2000   |
| V5                       | Abcam             | ab27671          | 1:1000   |
| Alpha-tubulin (B512)     | Sigma             | T5168            | 1:2000   |
| anti-rabbit-HRP          | Cell Signaling    | 7074             | 1:10000  |
| anti-mouse IRDye 680 nm  | Mandel Scientific | LIC-926-68070    | 1:10000  |
| anti-rabbit IRDye 800 nm | Mandel Scientific | LIC-926-32211    | 1:10000  |

#### Supplementary Table 2: siRNA duplex sequences

| Pooled siRNA duplex sequences (sense) |
|---------------------------------------|
| GCAGUGGGAUUCGAGAAGUG                  |
| AGAUUGUGCUCACGGGACA                   |
| GUGGAUUCGAGAAGUGACA                   |
| GCGAUGCUGAGAACCAAUA                   |

**Supplementary table 3: shRNA clone sequences**

| shRNA         | Clone          | Expressed sequence                                               |
|---------------|----------------|------------------------------------------------------------------|
| pLKO (vector) | SHC001         |                                                                  |
| shCtl         | SHC002         | CCGGCAACAAGATGAAGAGCACCAACTCGAGTTGGTGCTC<br>TTCATCTTGTTGTTTTTTG  |
| shHER3 A      | TRCN0000194972 | CCGGCTTCGTCATGTTGAACTATAACTCGAGTTATAGTTCA<br>ACATGACGAAGTTTTTTG  |
| shHER3 B      | TRCN0000199364 | CCGGCCTGTGCATGTGCTCTTATTGCTCGAGCAATAAGAGC<br>ACATGCACAGGTTTTTTG  |
| shMPZL3 A     | TRCN0000137252 | CCGGGCAGCCACACAGTATCAATATCTCGAGATATTGATAC<br>TGTGTGGCTGCTTTTTTTG |
| shMPZL3 B     | TRCN0000167937 | CCGGCCAGGGTGTTTATATCGTCTTCTCGAGAAGACGATAT<br>AAACACCCTGGTTTTTTG  |
| shMPZL3 C     | TRCN0000167873 | CCGGGAGATCATCAGTAAAGACTTTCTCGAGAAAGTCTTTA<br>CTGATGATCTCTTTTTTTG |

**Supplementary table 4: MPZL3 clone sequence**

| shRNA         | Clone          | Expressed sequence                                               |
|---------------|----------------|------------------------------------------------------------------|
| pLKO (vector) | SHC001         |                                                                  |
| shCtl         | SHC002         | CCGGCAACAAGATGAAGAGCACCAACTCGAGTTGGTGCTC<br>TTCATCTTGTTGTTTTTTG  |
| shHER3 A      | TRCN0000194972 | CCGGCTTCGTCATGTTGAACTATAACTCGAGTTATAGTTCA<br>ACATGACGAAGTTTTTTG  |
| shHER3 B      | TRCN0000199364 | CCGGCCTGTGCATGTGCTCTTATTGCTCGAGCAATAAGAGC<br>ACATGCACAGGTTTTTTG  |
| shMPZL3 A     | TRCN0000137252 | CCGGGCAGCCACACAGTATCAATATCTCGAGATATTGATAC<br>TGTGTGGCTGCTTTTTTTG |
| shMPZL3 B     | TRCN0000167937 | CCGGCCAGGGTGTTTATATCGTCTTCTCGAGAAGACGATAT<br>AAACACCCTGGTTTTTTG  |
| shMPZL3 C     | TRCN0000167873 | CCGGGAGATCATCAGTAAAGACTTTCTCGAGAAAGTCTTTA<br>CTGATGATCTCTTTTTTTG |

**Supplementary table 5: Sequences for RT-qPCR primers**

| <b>Gene</b>    | <b>Primers</b> |                              |
|----------------|----------------|------------------------------|
| <i>ERBB3</i>   | forward        | GGGGAGTCTTGCCAGGAG           |
|                | reverse        | CATTGGGTGTAGAGAGACTGGAC      |
| <i>MPZL3</i>   | forward        | ATTCCCATGACAGAGCTAACAG       |
|                | reverse        | GCACAAAGACAAGGATGGAAAG       |
| <i>NYNRIN</i>  | forward        | CTGAGCTGAGACCAGGATTAAG       |
|                | reverse        | GTTGGAGAGAATGTGGGTGTAG       |
| <i>LGR6</i>    | forward        | CTCTTCCCTTTCCTCTC            |
|                | reverse        | CTGAGTTTTGGTTGTATTTG         |
| <i>BHLHE41</i> | forward        | AGAGGAAACGAACAGCAGTTGA       |
|                | reverse        | TAGGTATCCTTGGTGTCGTCTCG      |
| <i>RAMP1</i>   | forward        | TGGAGCCTTGGGACAGA            |
|                | reverse        | GGCTTCCAGGTTAATACCAGAG       |
| <i>SPNS2</i>   | forward        | CCATCTTCATCTGCCTGATCTT       |
|                | reverse        | CAGTGATGGCCAGTTAGAAA         |
| <i>PPM1K</i>   | forward        | TTTCCAAACCAACAGGCAAAG        |
|                | reverse        | CCTCCCAAAGTGCTAGGATTAC       |
| <i>RPLP0</i>   | forward        | CTCAACATCTCCCCCTTCTC         |
|                | reverse        | GACTCGTTTGTACCCGTTGA         |
| <i>GAPDH</i>   | forward        | GCACCAGGTGGTCTCCTCT          |
|                | reverse        | TGACAAAGTGGTCGTTGAGG         |
| <i>HPRT</i>    | forward        | TGATAGATCCATTCCCTATGACTGTAGA |
|                | reverse        | CAAGACATTCTTCCAGTTAAAGTTG    |

Supplementary Figure 1

A

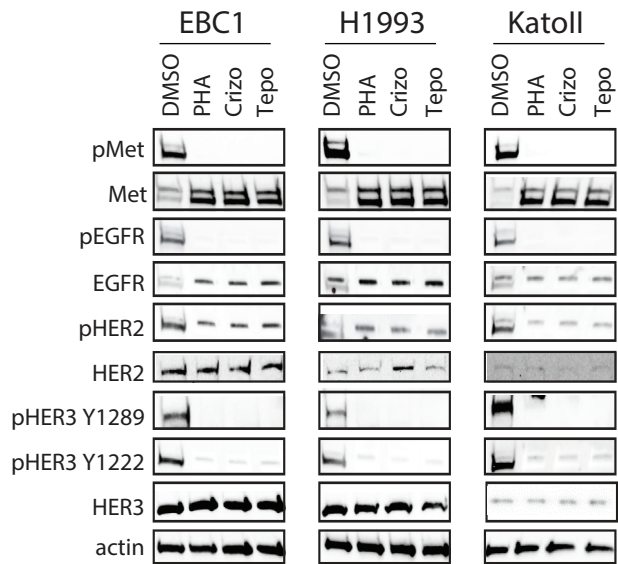

B

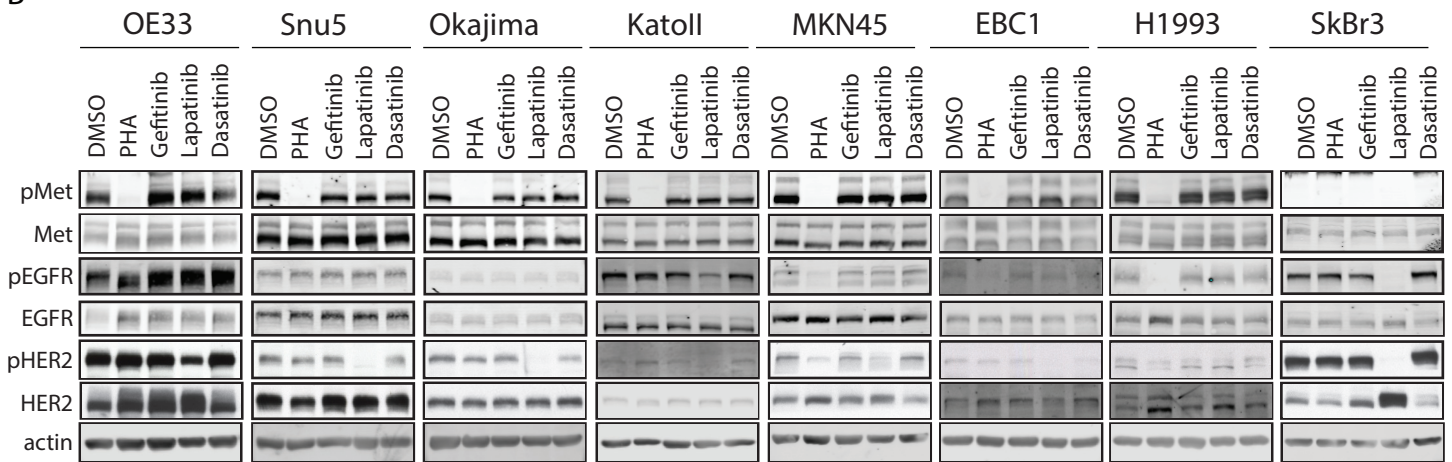

C

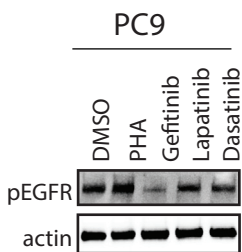

**Supplementary Fig. 1 Controls for multiple kinase inhibitors used in MET-amplified cells.** Controls for multiple kinase inhibitors used in MET-amplified cells. (A) Western blot analysis of the phosphorylation of Met (Tyr1234/35), EGFR (Tyr1173), HER2 (Tyr1221/22), HER3 (Tyr1289), and HER3 (Tyr1222) in the indicated cell lines treated with the Met inhibitors: PHA (0.5  $\mu$ M); Crizotinib (Crizo) (0.1  $\mu$ M); and Tepotinib (Tepo) (0.1  $\mu$ M), for 1 hour (n=2). (B) Western blot analysis of the phosphorylation of Met (Tyr1234/35), EGFR (Tyr1173) and HER2 (Tyr1221/22) in the indicated cell lines treated with PHA (0.5  $\mu$ M); the EGFR inhibitor, gefitinib (1  $\mu$ M); the HER2/EGFR inhibitor lapatinib (1  $\mu$ M); or the Src and Abl family kinase inhibitor, dasatinib (0.1  $\mu$ M), for 1 hour (n=3). (C) Western blot analysis of the phosphorylation of EGFR (Tyr1173) in PC9 cells treated with PHA (0.5  $\mu$ M); the EGFR inhibitor, gefitinib (1  $\mu$ M); the HER2/EGFR inhibitor lapatinib (1  $\mu$ M); or the Src and Abl family kinase inhibitor, dasatinib (0.1  $\mu$ M), for 1 hour (n=2).

## Supplementary Figure 2

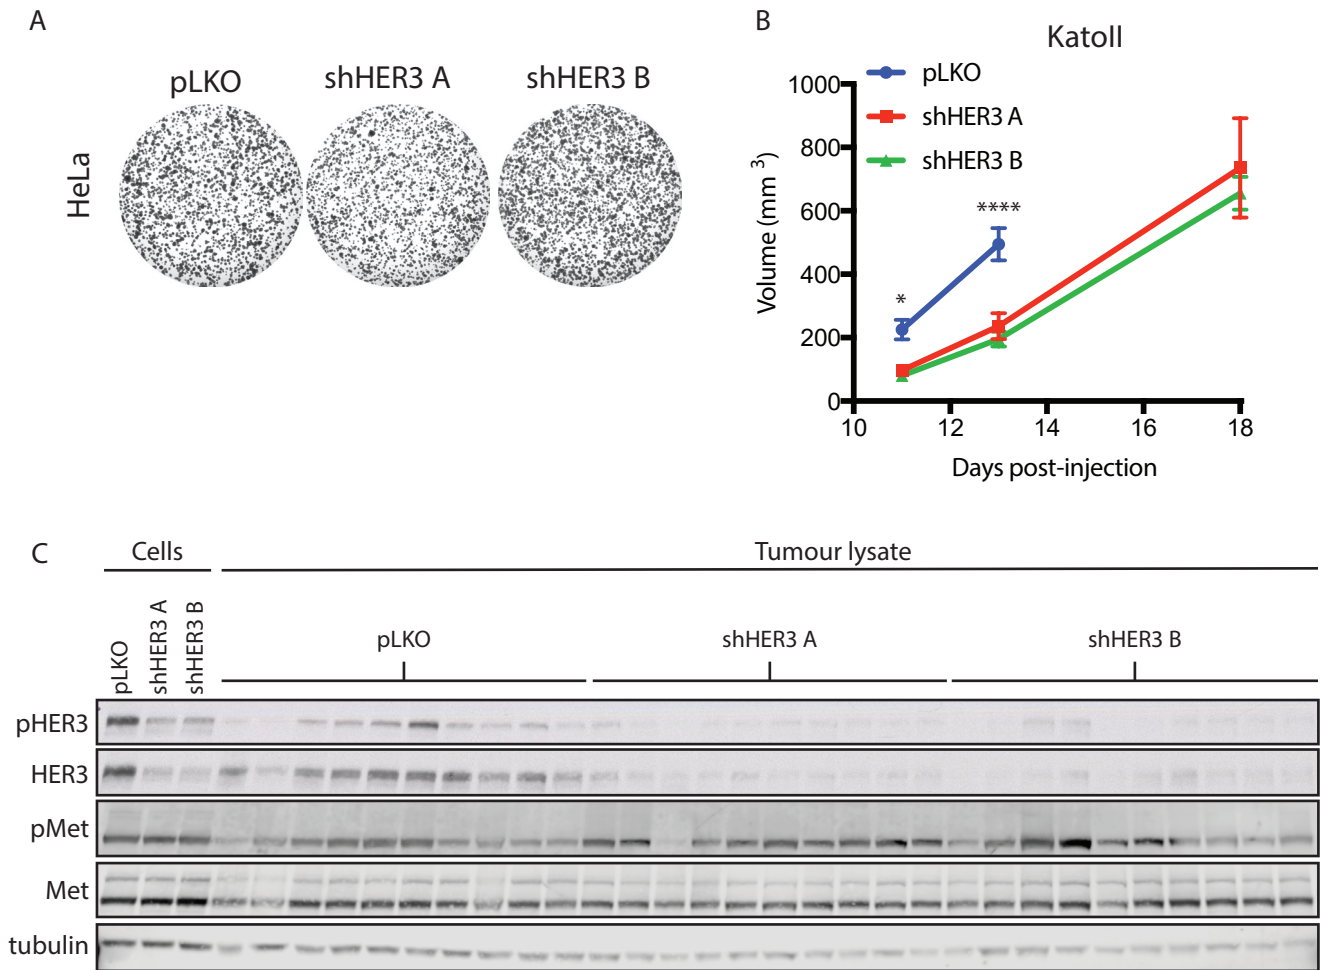

**Supplementary fig. 2** Growth of shRNA-treated cells in vitro and in vivo. (a) HeLa cells transduced with shRNA targeting HER3 form colonies at the same rate as controls (pLKO (n=3)). (b) Tumour volumes of Katoll-derived xenografts shown in figure 2e at both points measured before collection (n=10). (c) Western blot analysis of total and phosphorylated Met and HER3 in Katoll tumours at end-point. \*,  $P < 0.05$ , \*\*\*\*,  $P < 0.0001$ .

### Supplementary Figure 3

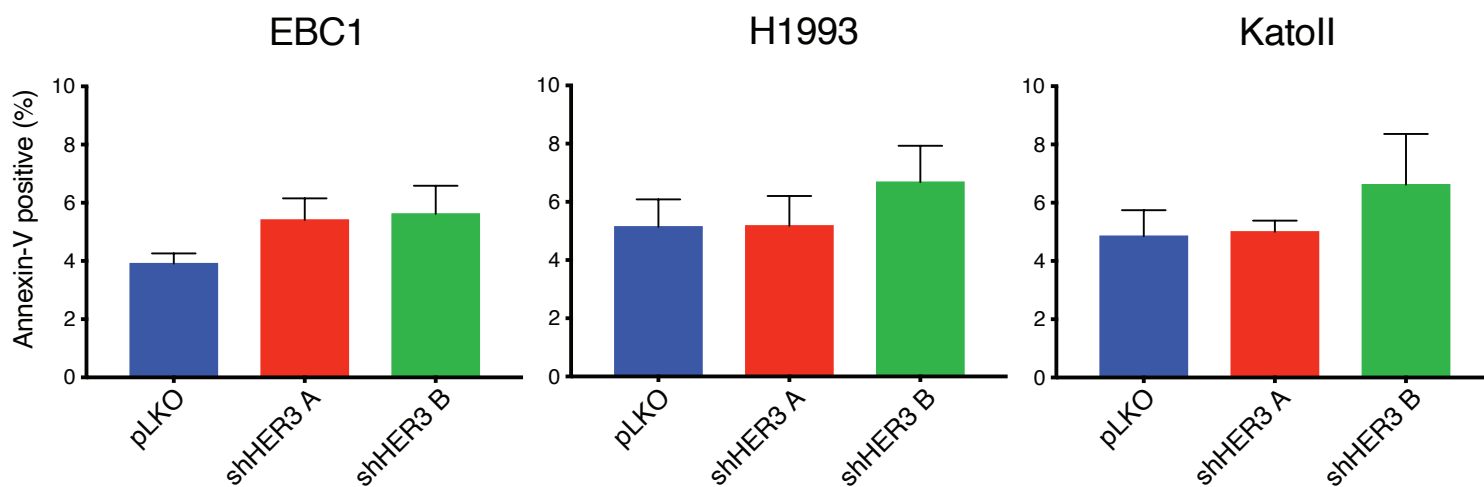

**Supplementary Fig. 3** Apoptosis in shRNA-treated cells. Analysis of annexin-V positivity by flow cytometry in EBC1, H1993 and Katoll cells transduced with shRNA targeting HER3 or control (pLKO).

## Supplementary Figure 4

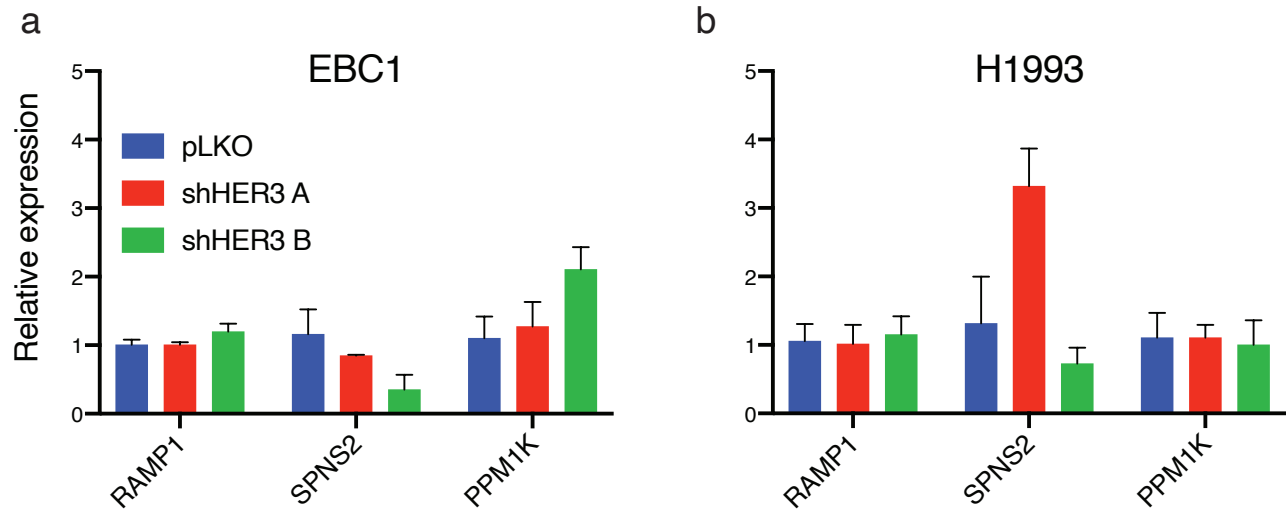

**Supplementary Fig. 4** Gene expression analysis of upregulated transcripts from Katoll RNA sequencing in EBC1 and H1993 cells. Measurement of the relative amounts of RAMP1, SPNS2 and PPM1K genes in the indicated cell lines by RT-qPCR

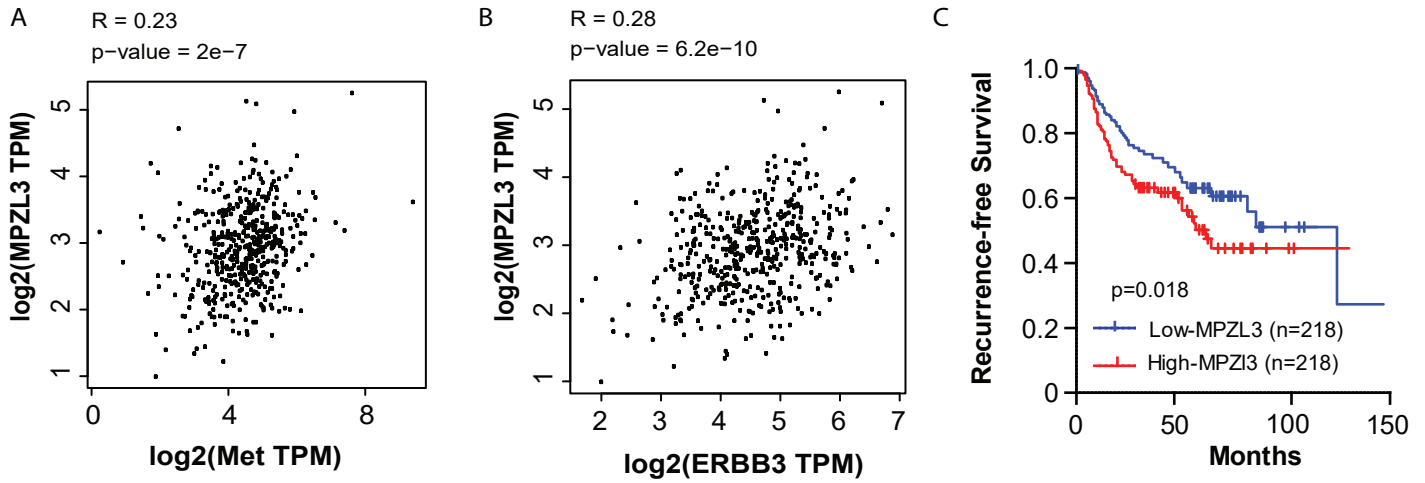

**Fig. S5** MPZL3 levels correlate with Met and ERBB3 expression and are associated with poor clinical outcome in Lung squamous cell carcinomas. (a-b) Correlation between the indicated genes in LUSC tumors, estimated using Pearson's correlation (n=436). (c) Recurrence-free survival in LUSC (n=436). Data from Gepia2. Student's t-test; \* $p \leq 0.05$ ; \*\* $p \leq 0.01$ ; \*\*\* $p \leq 0.001$ ; \*\*\*\* $p \leq 0.0001$ .



Figure 1A

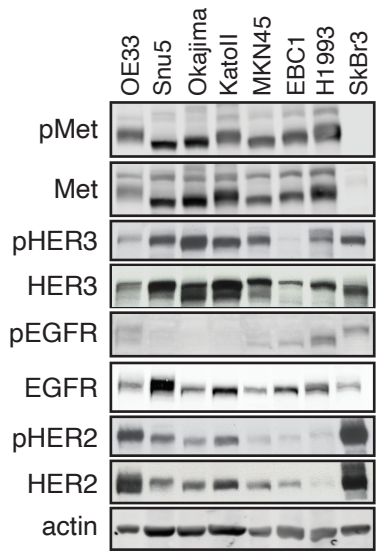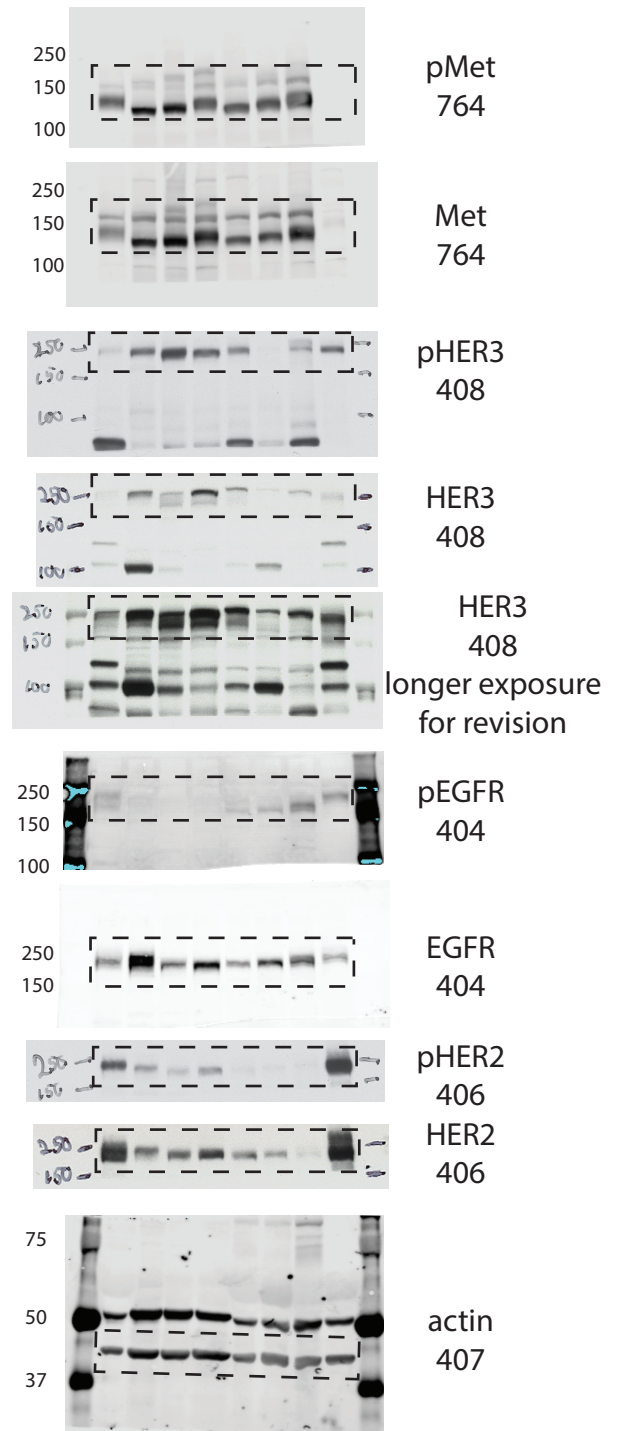

Figure 1B

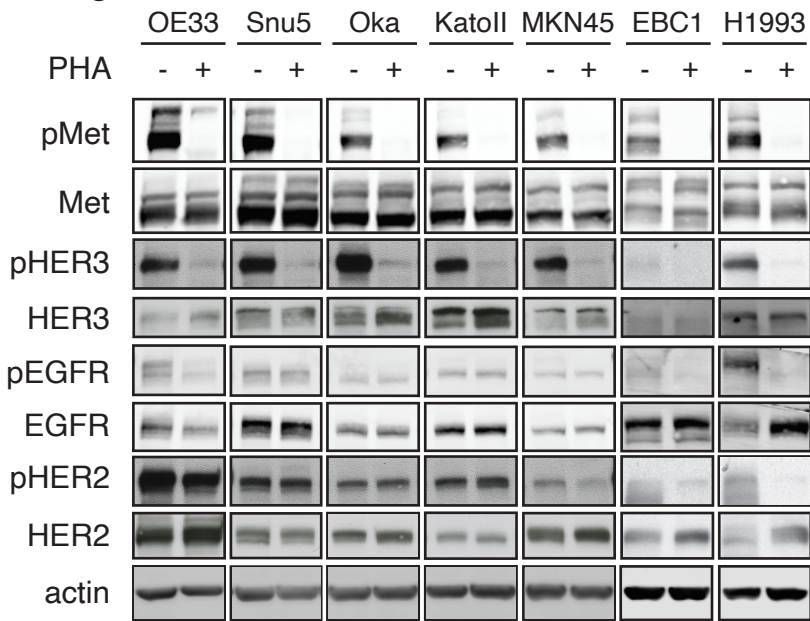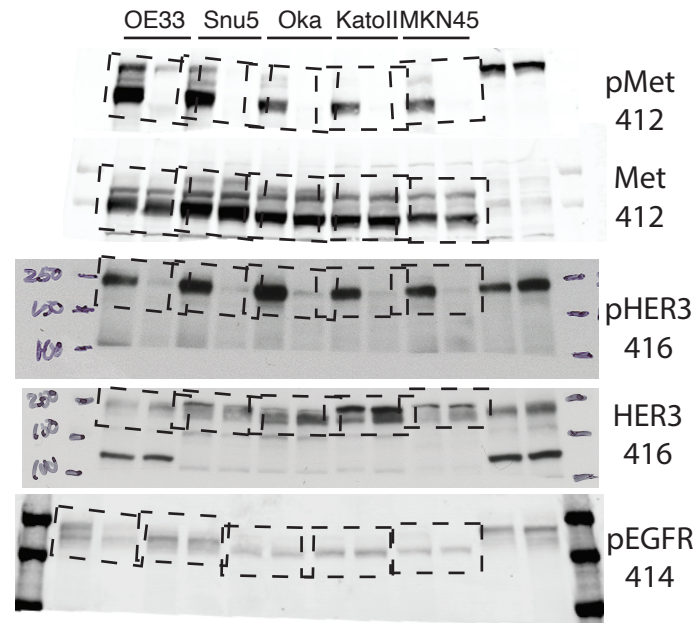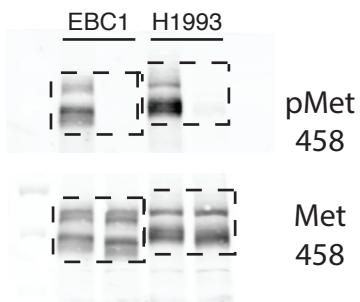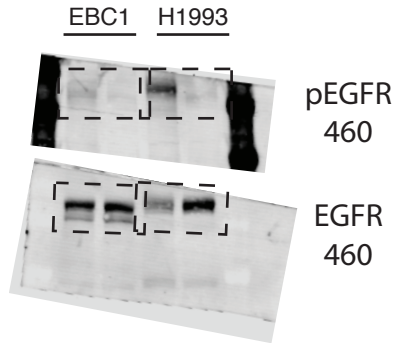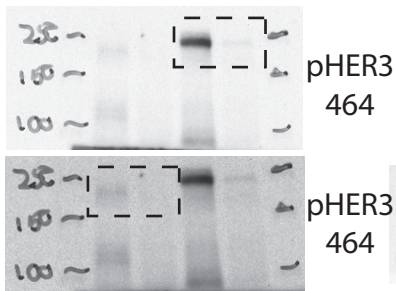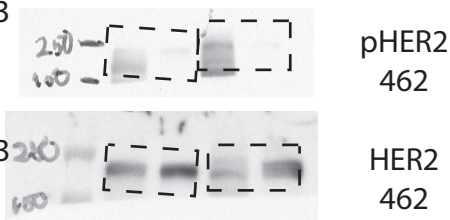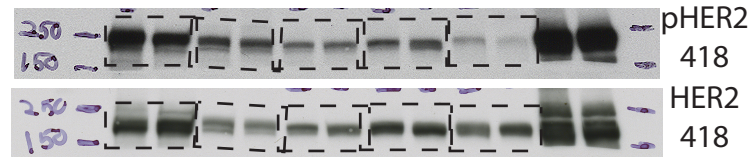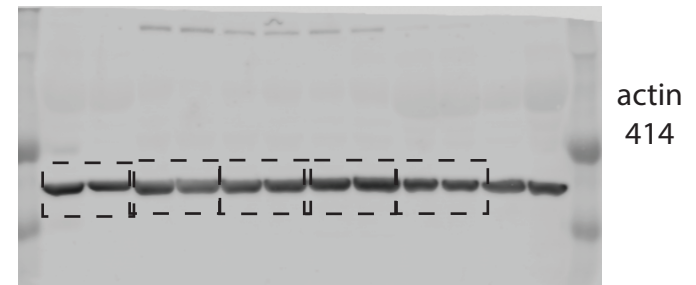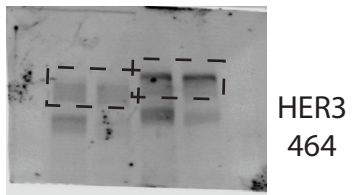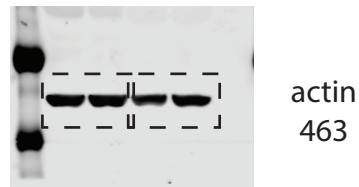

Figure 1C

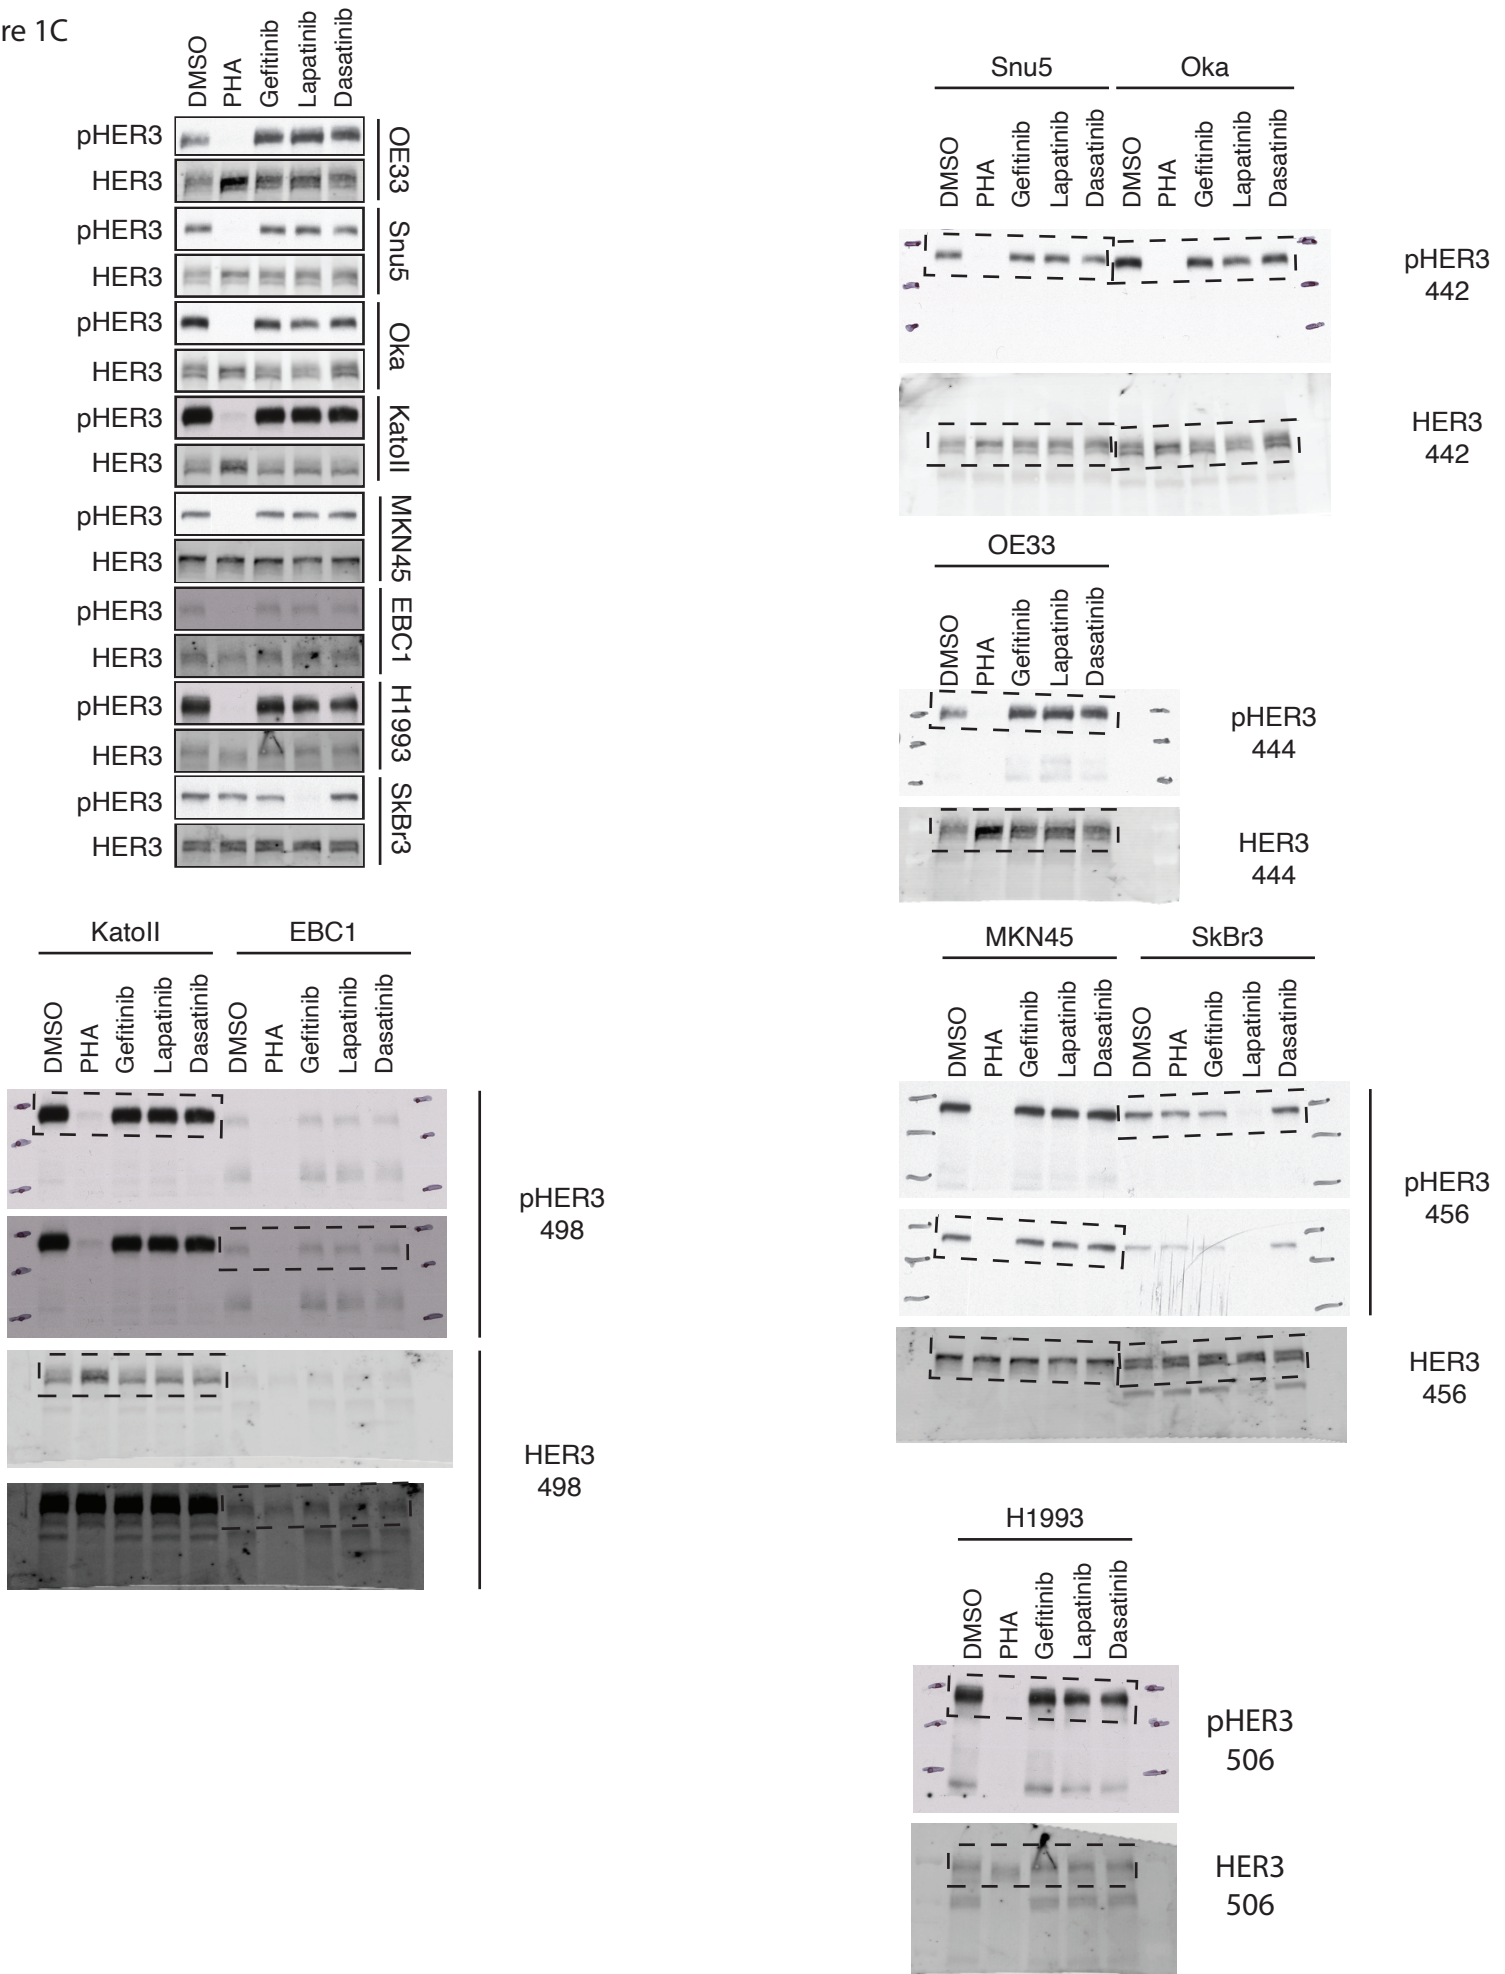

Figure 2A

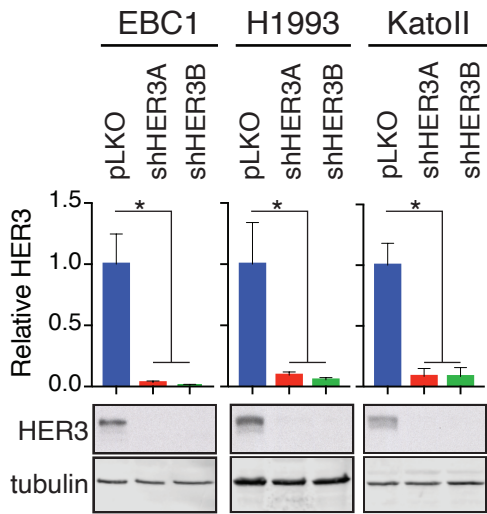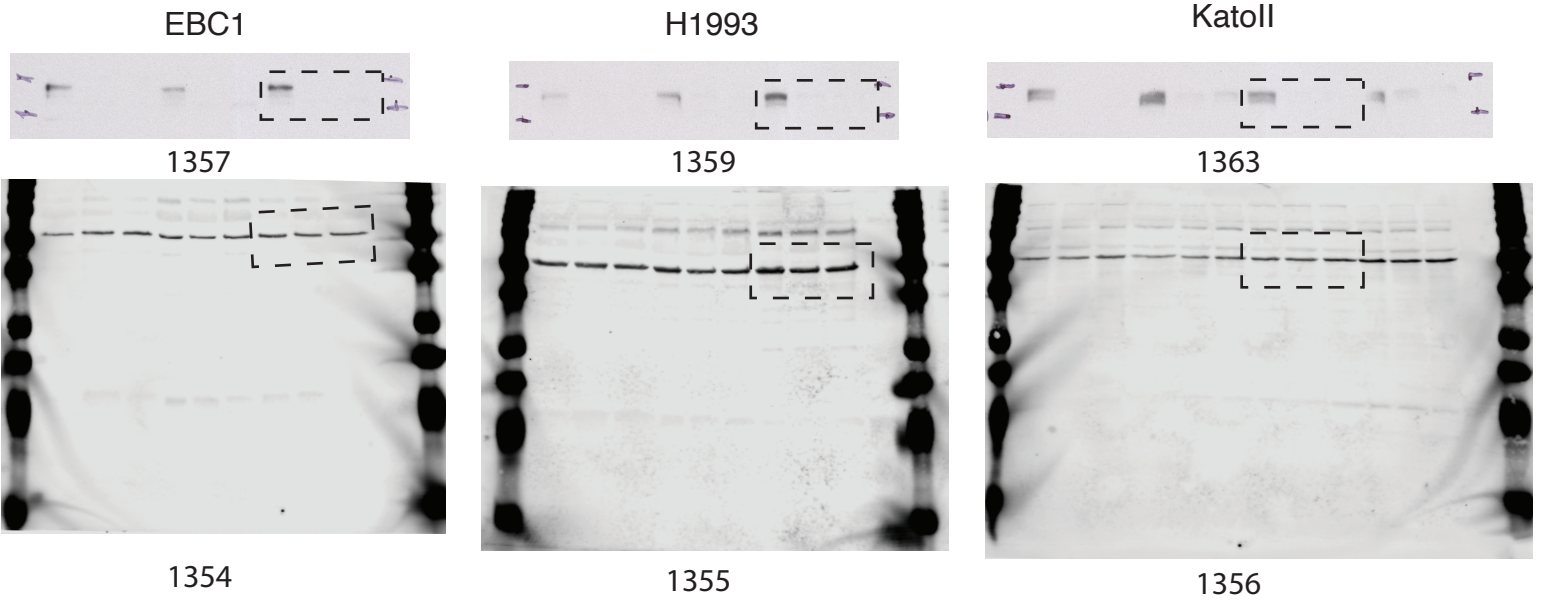

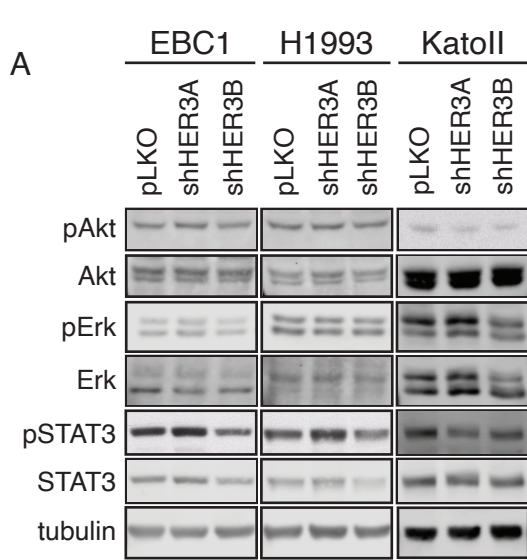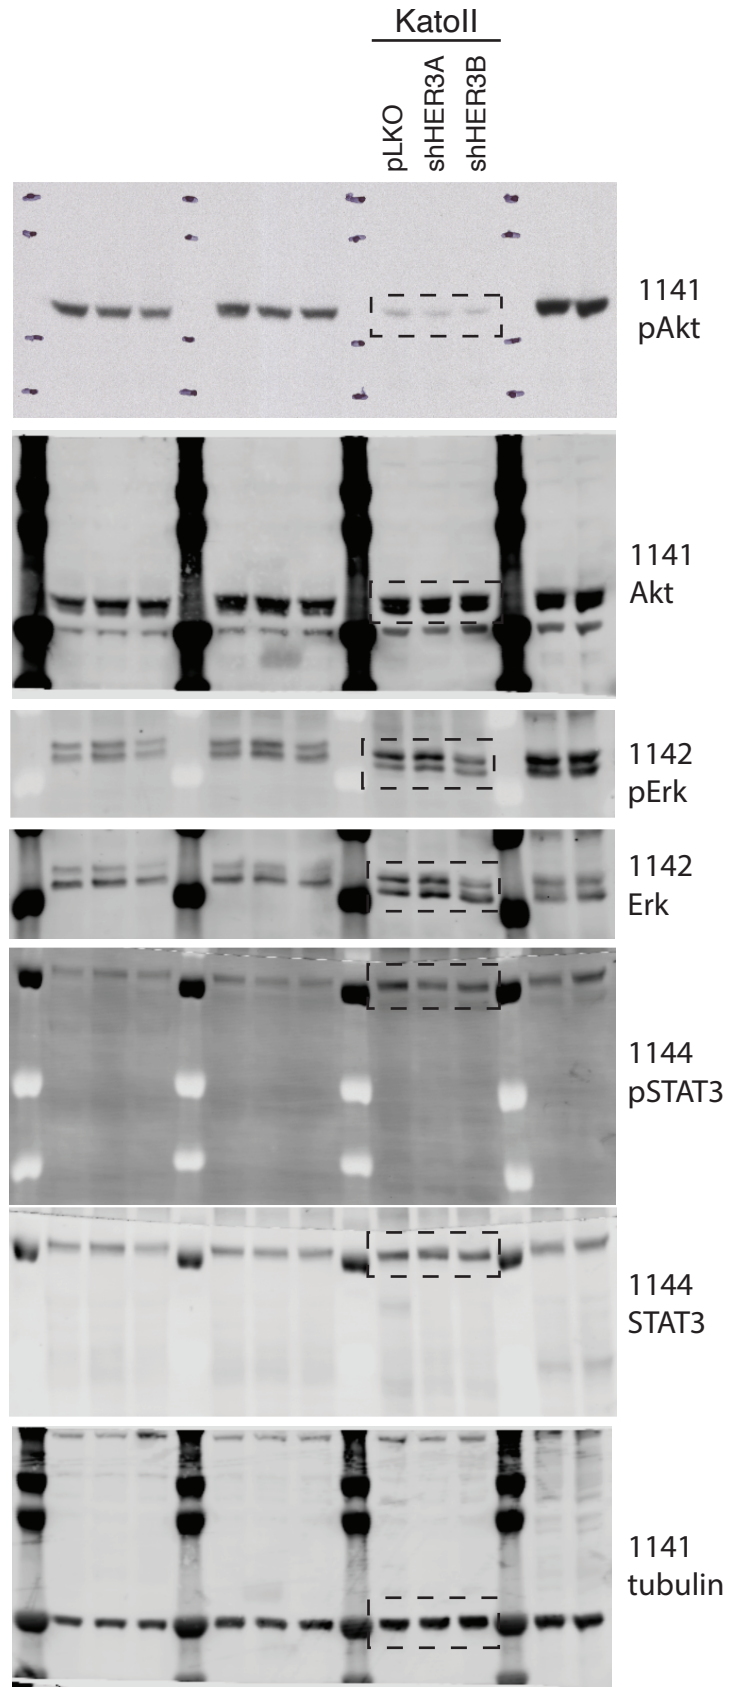

EBC1

pLKO  
shHER3A  
shHER3B

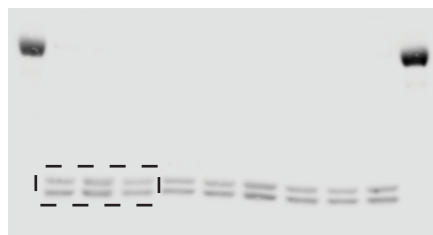

881  
pErk

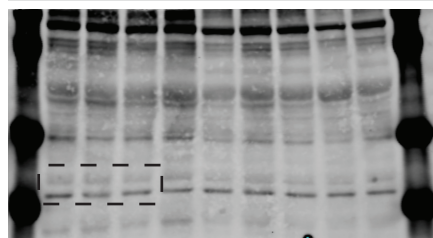

881  
Erk

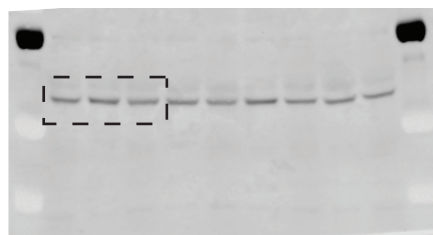

881  
pAkt

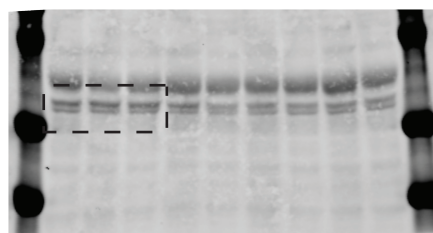

881  
Akt

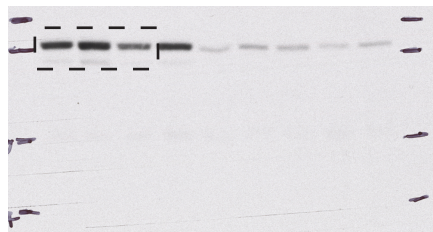

879  
pSTAT3

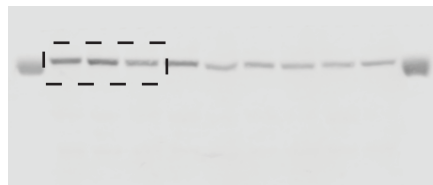

879  
STAT3

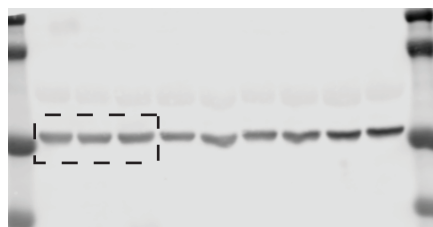

879  
tubulin

H1993

pLKO  
shHER3A  
shHER3B

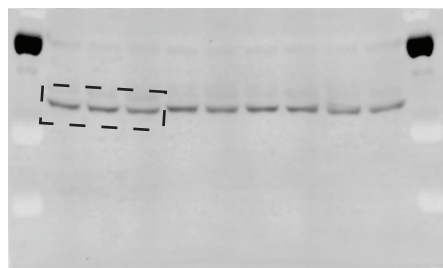

889  
pAkt

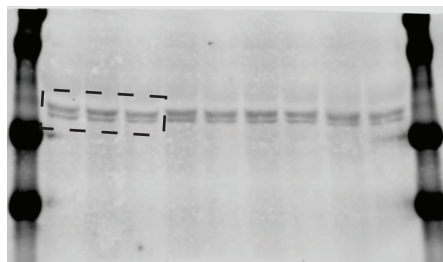

889  
Akt

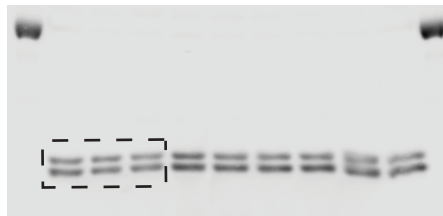

889  
pErk

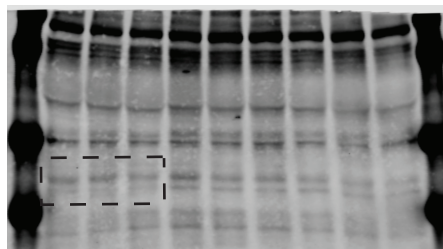

889  
Erk

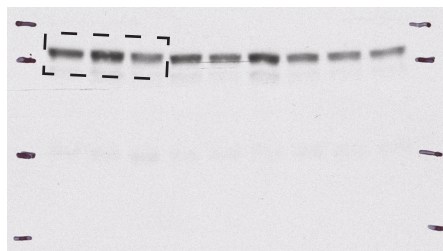

887  
pSTAT3

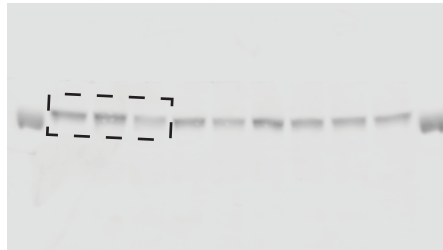

887  
STAT3

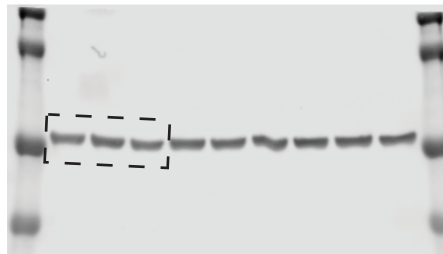

887  
tubulin

Figure 4A

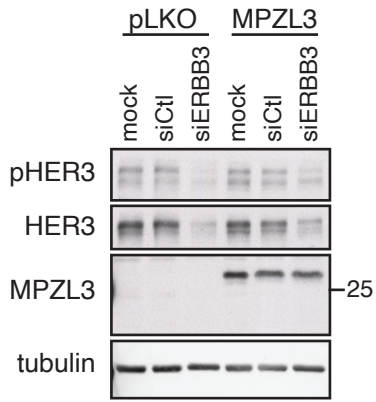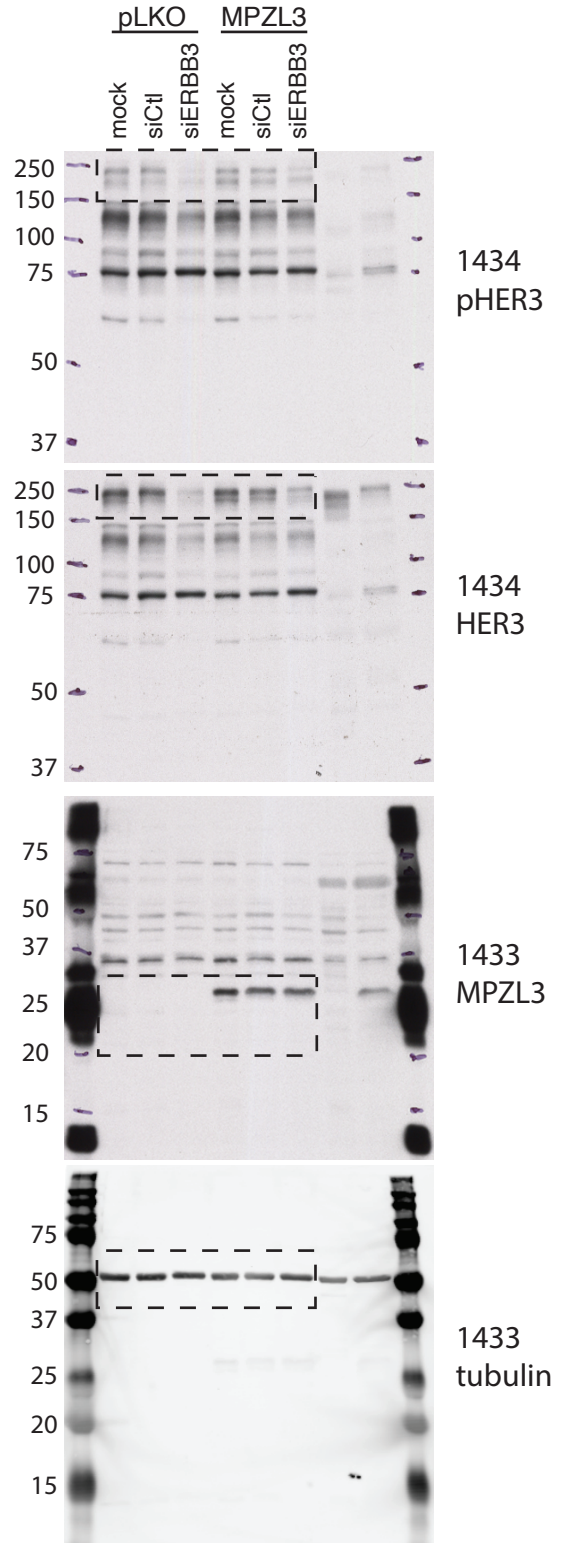

Figure 4E

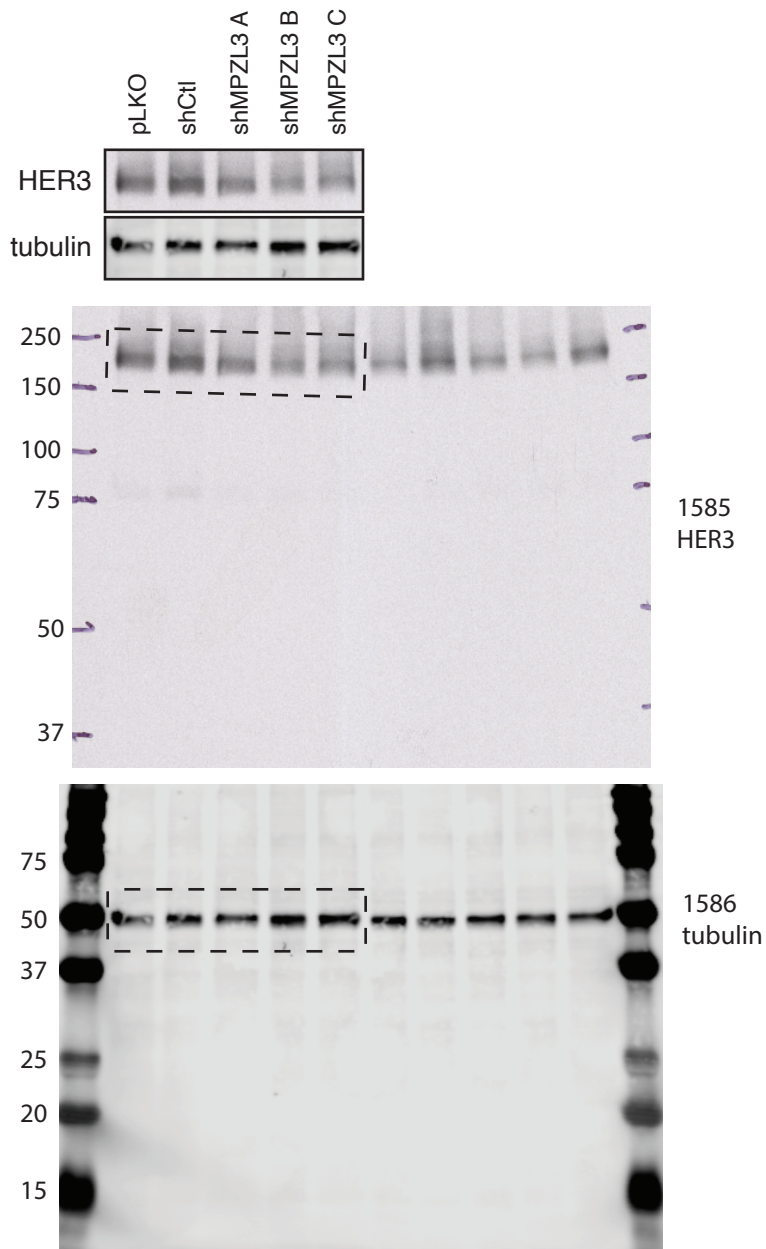

Figure 4H

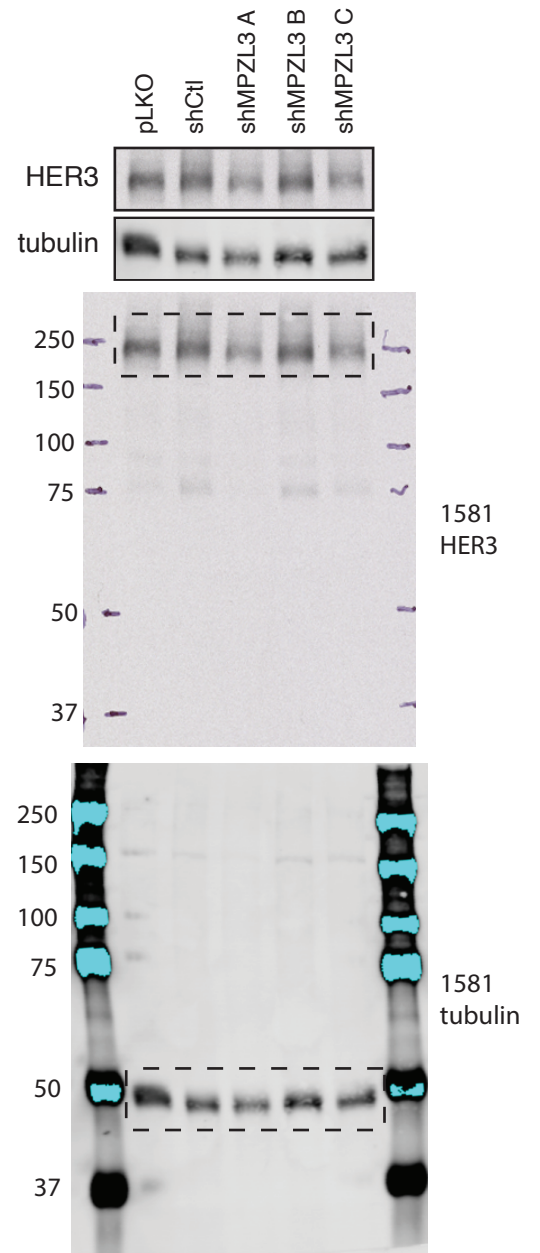



Figure 5A

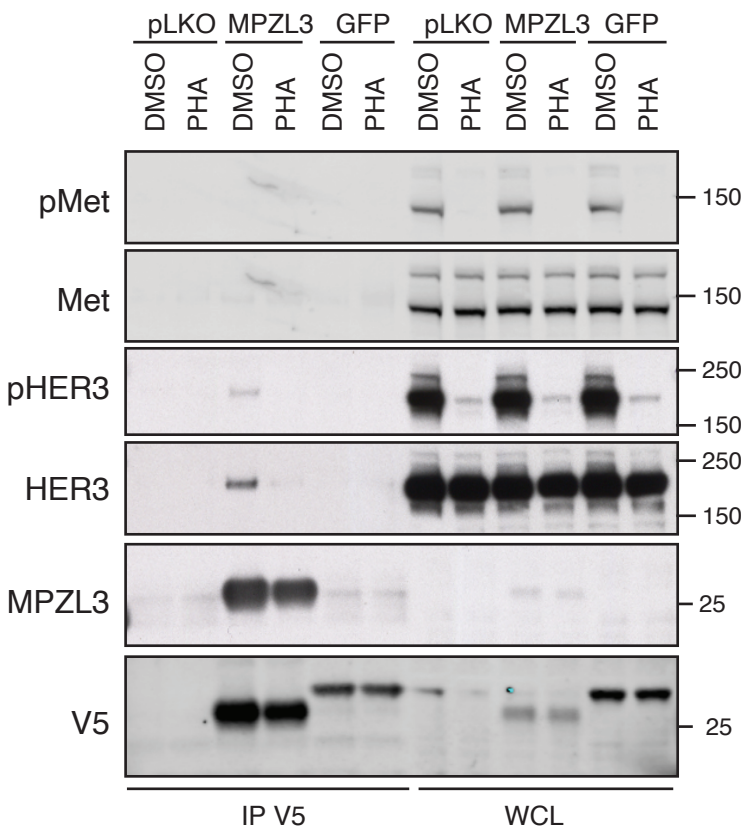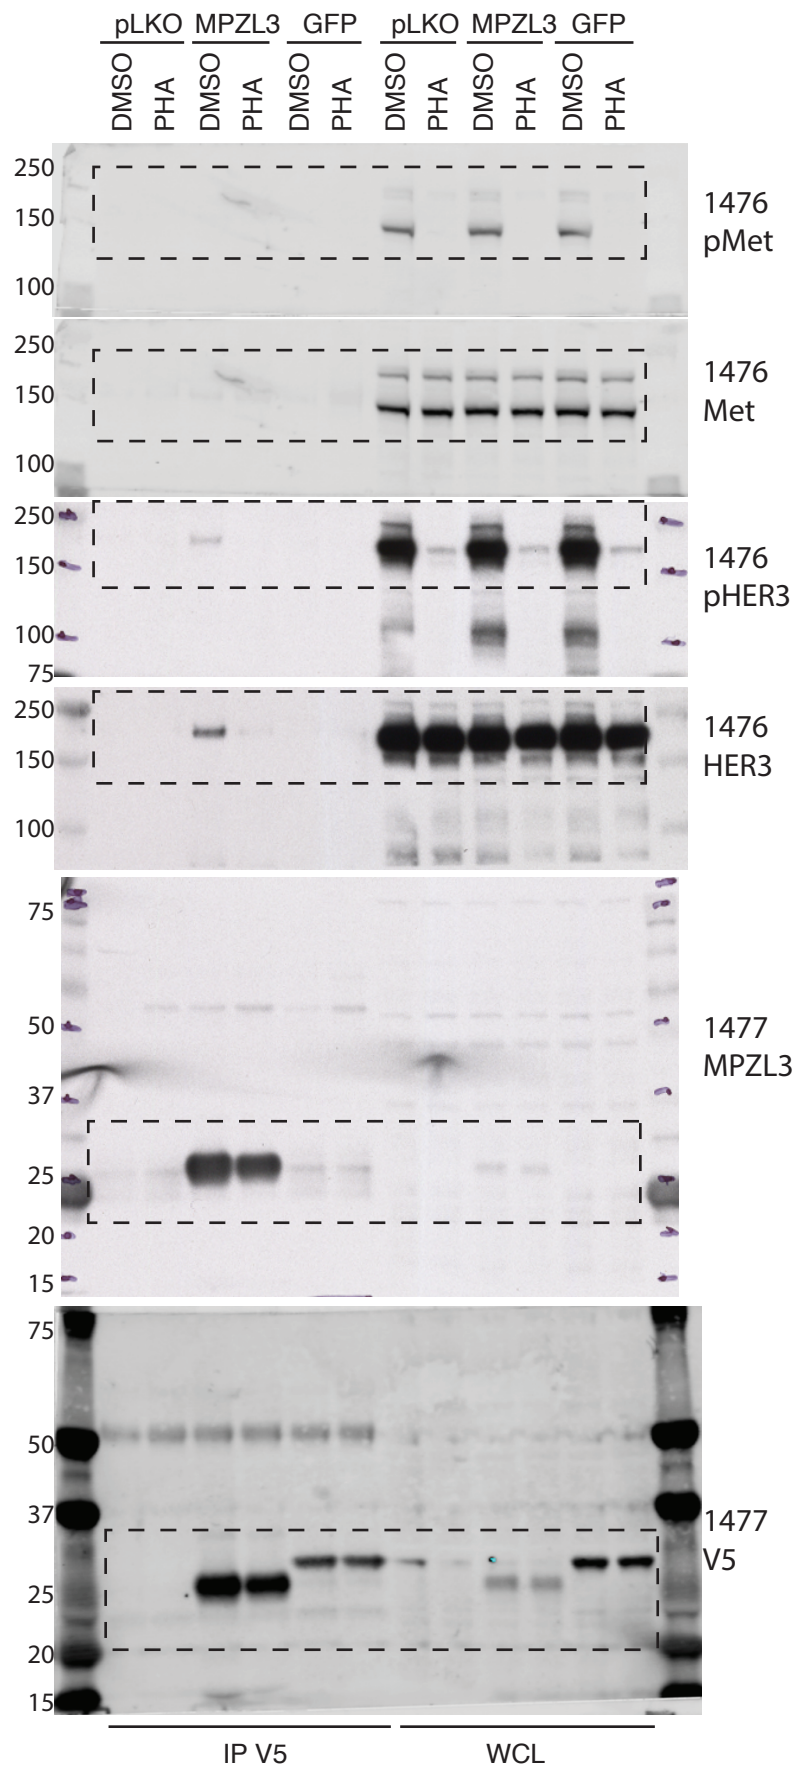

Figure 5B

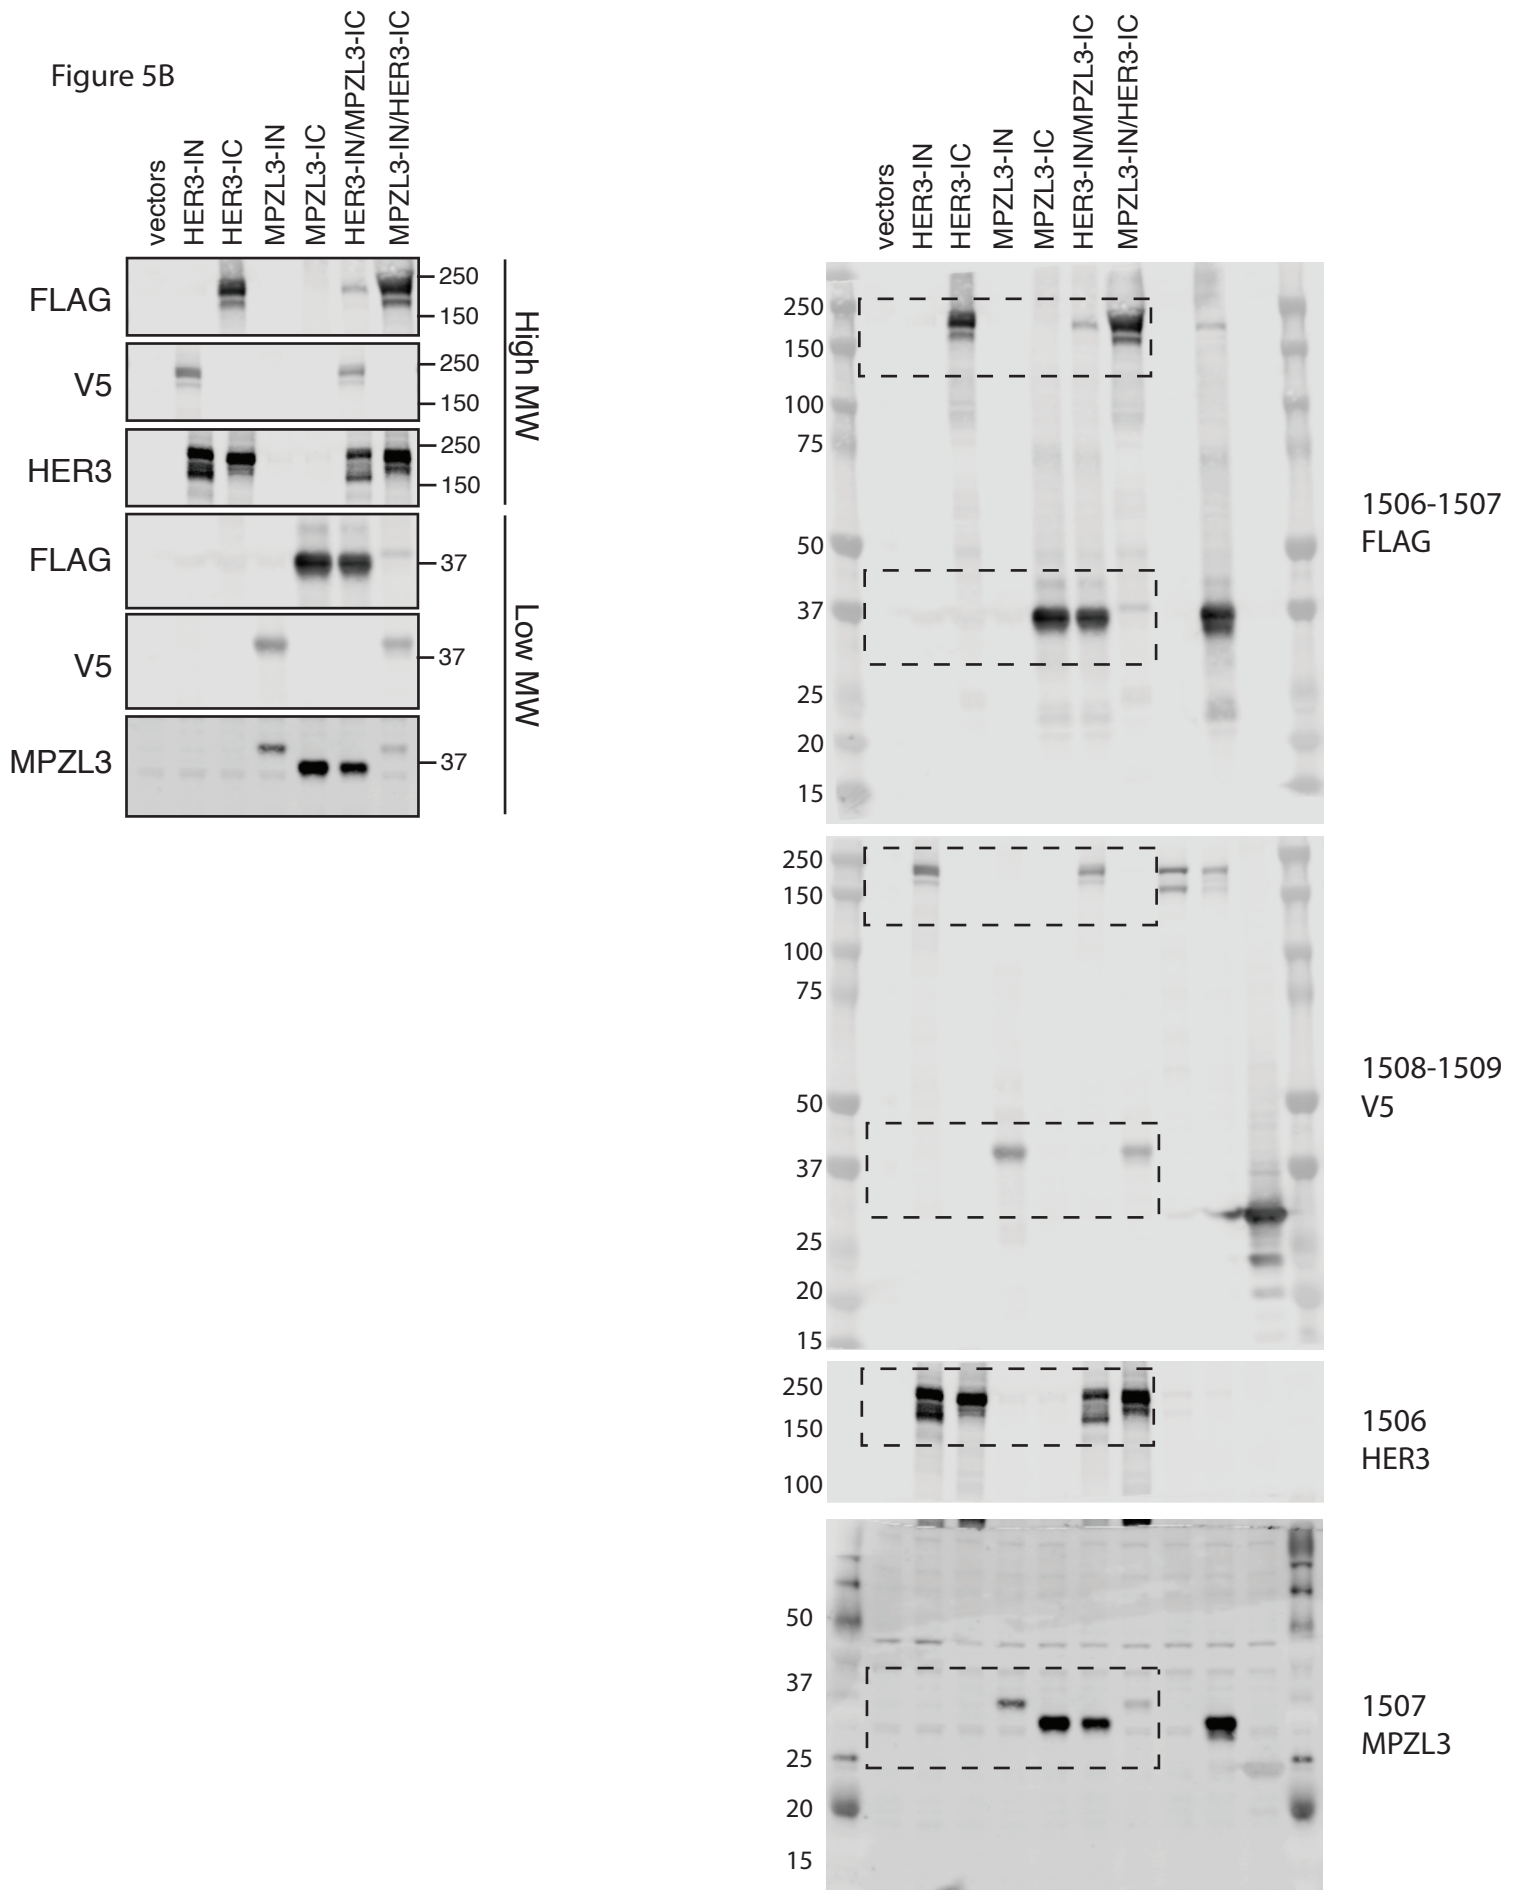

Figure 5D

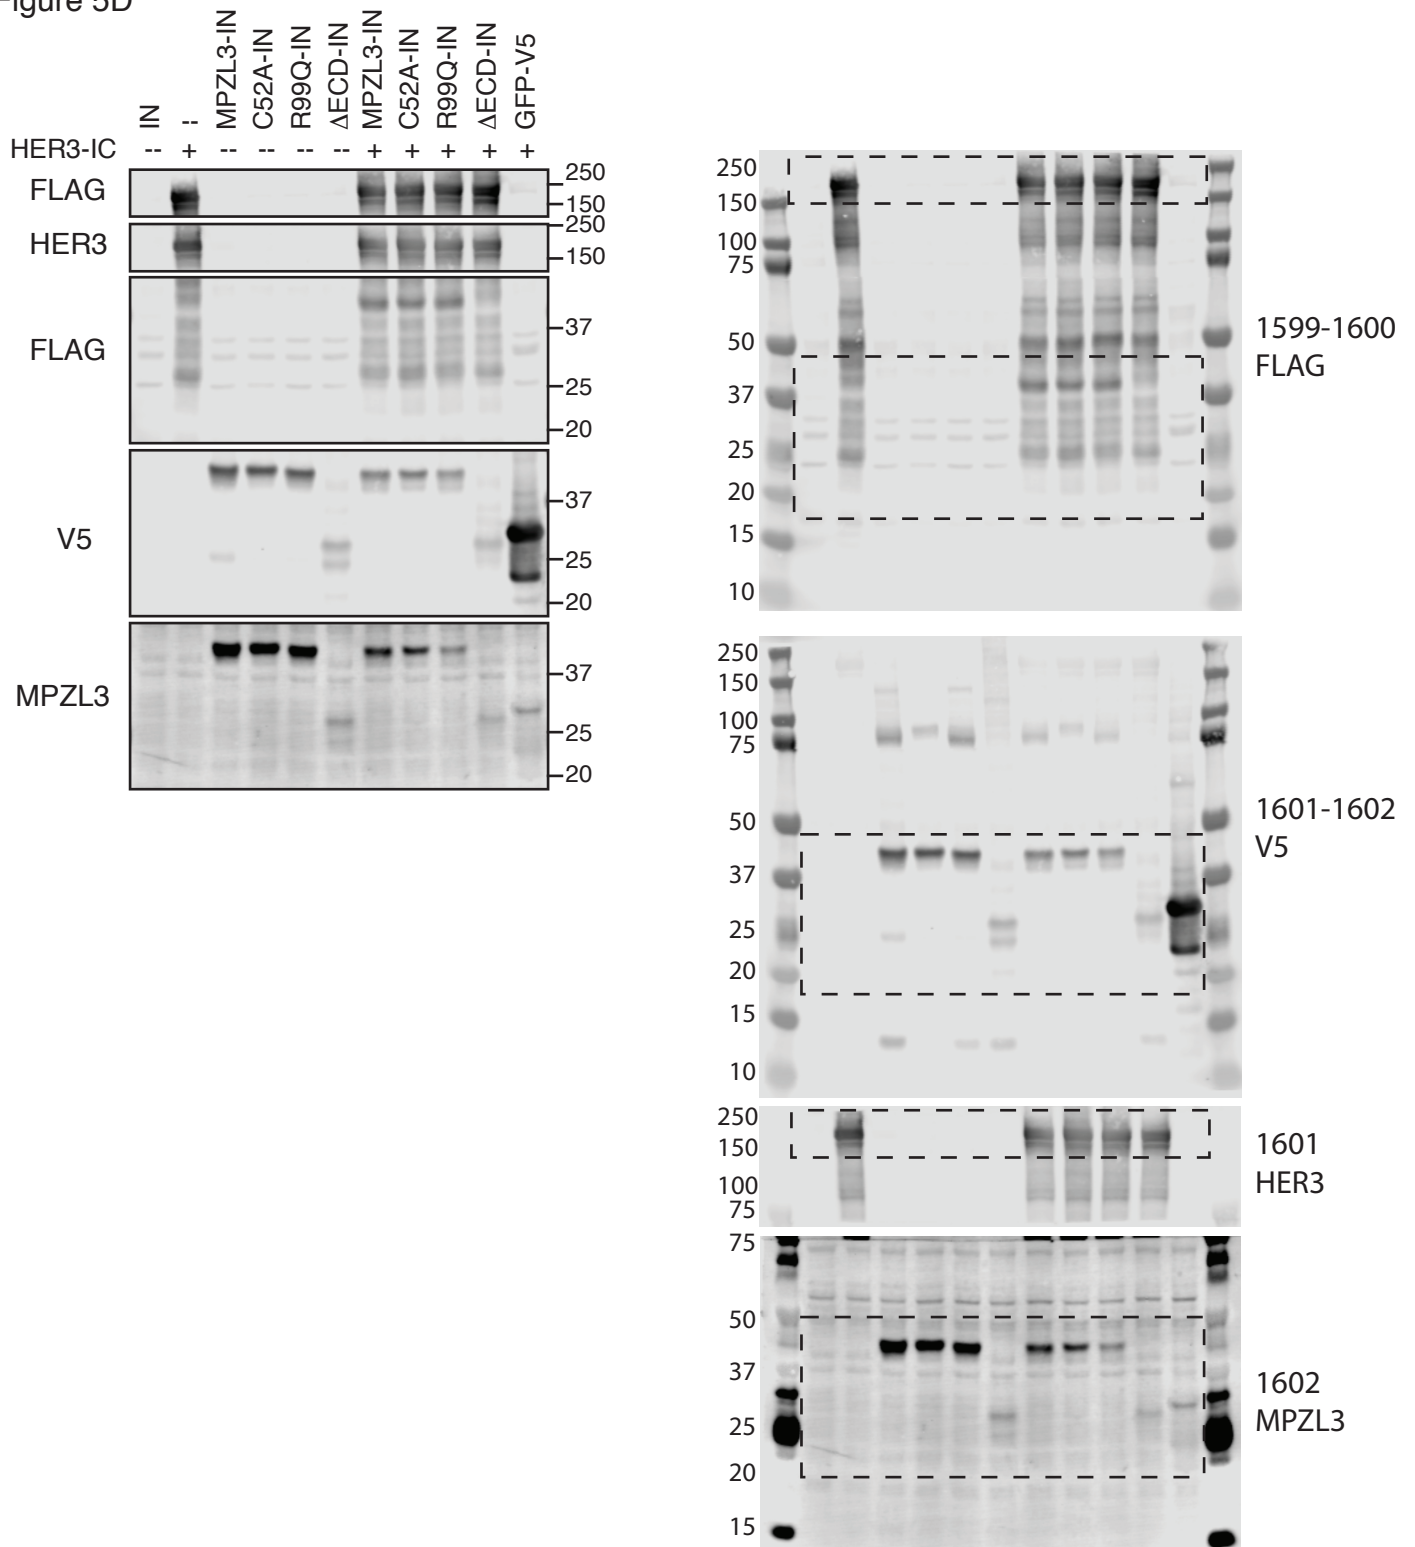

FigureS1A

A

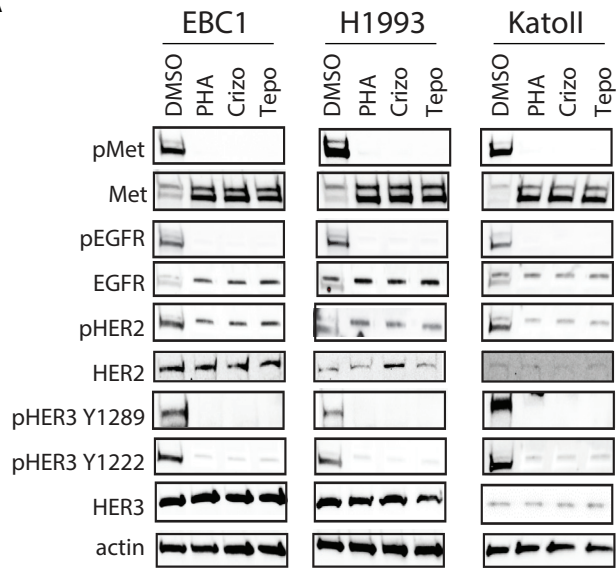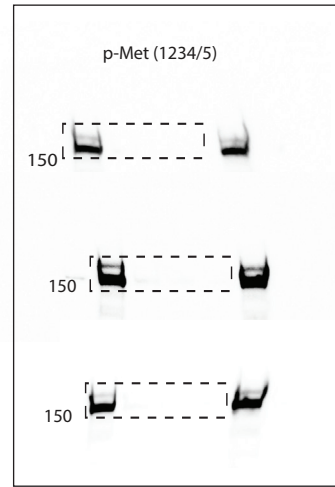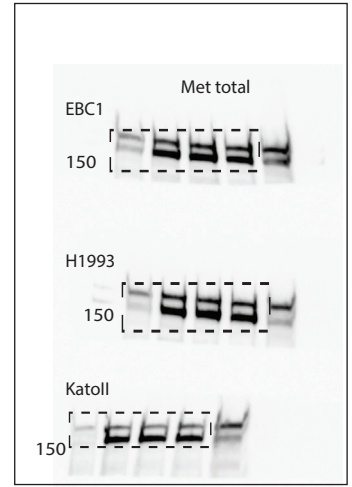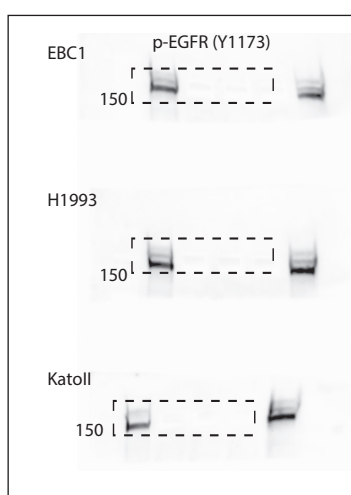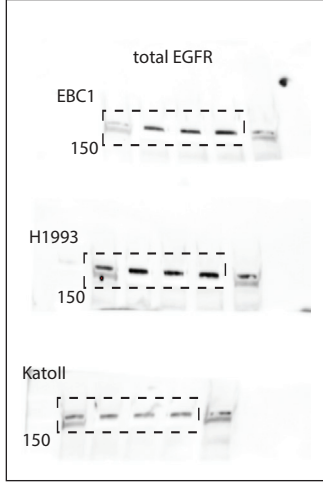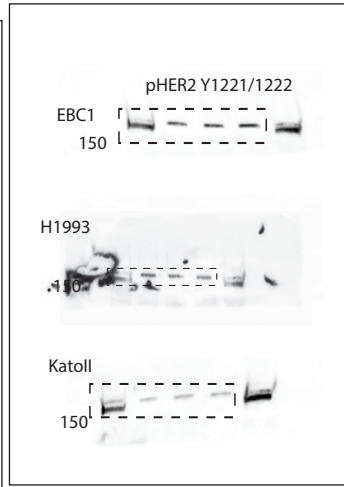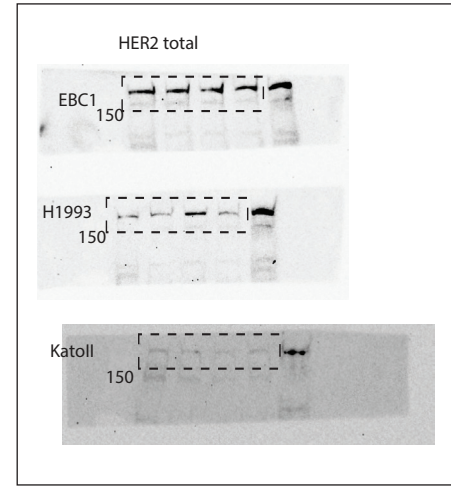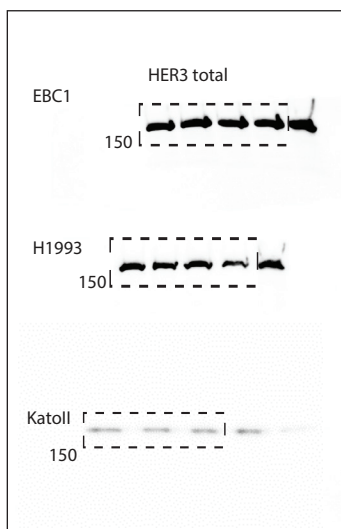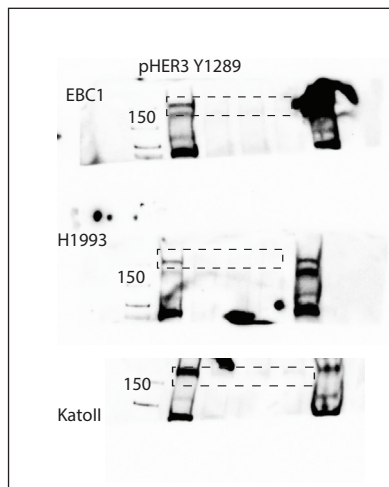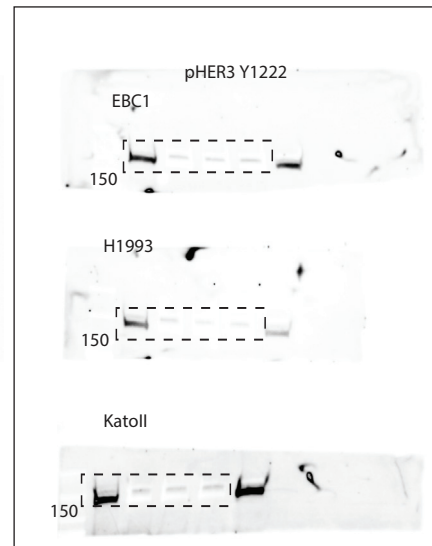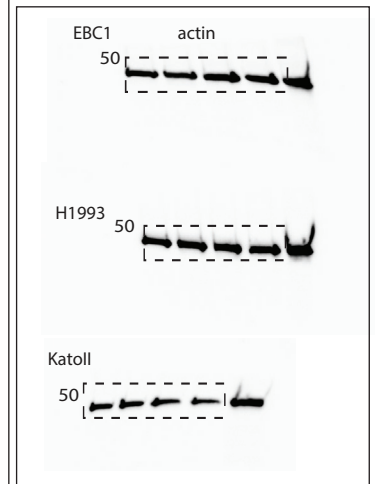

Figure S1b

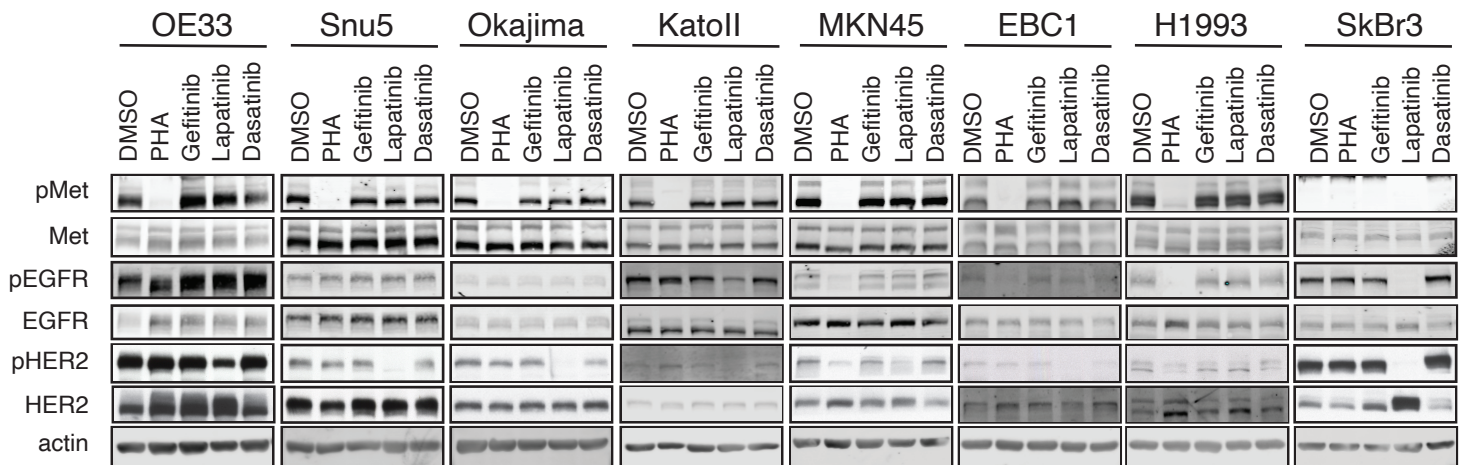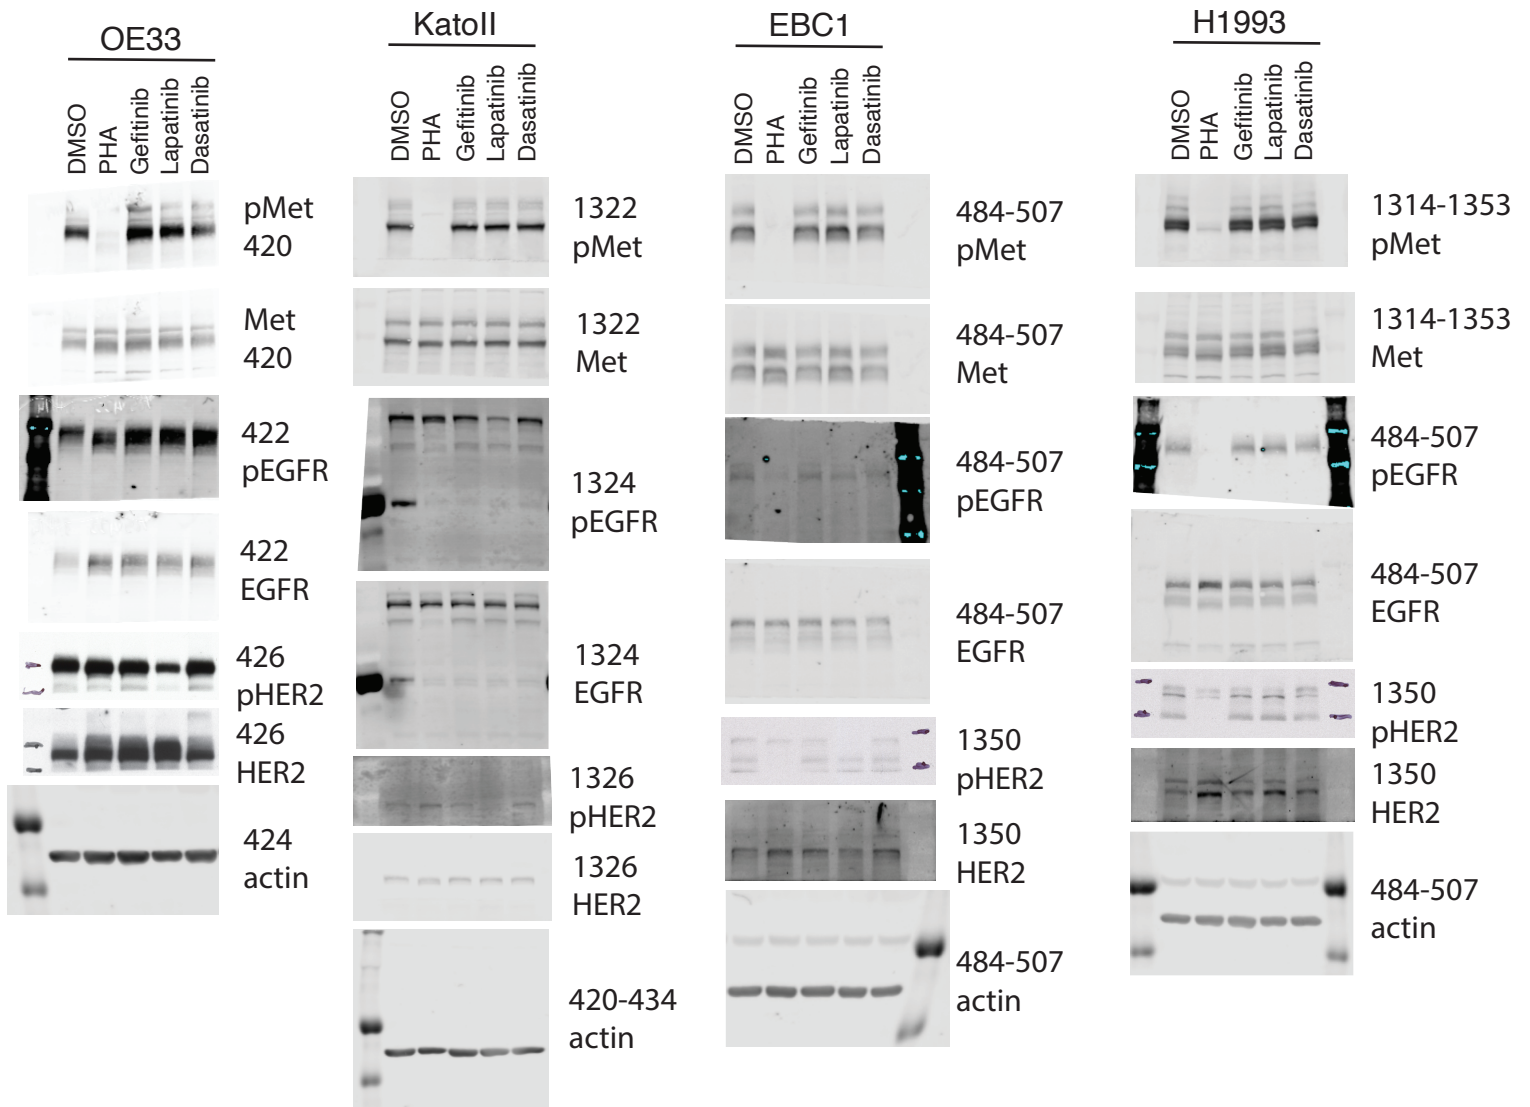

Figure S1b

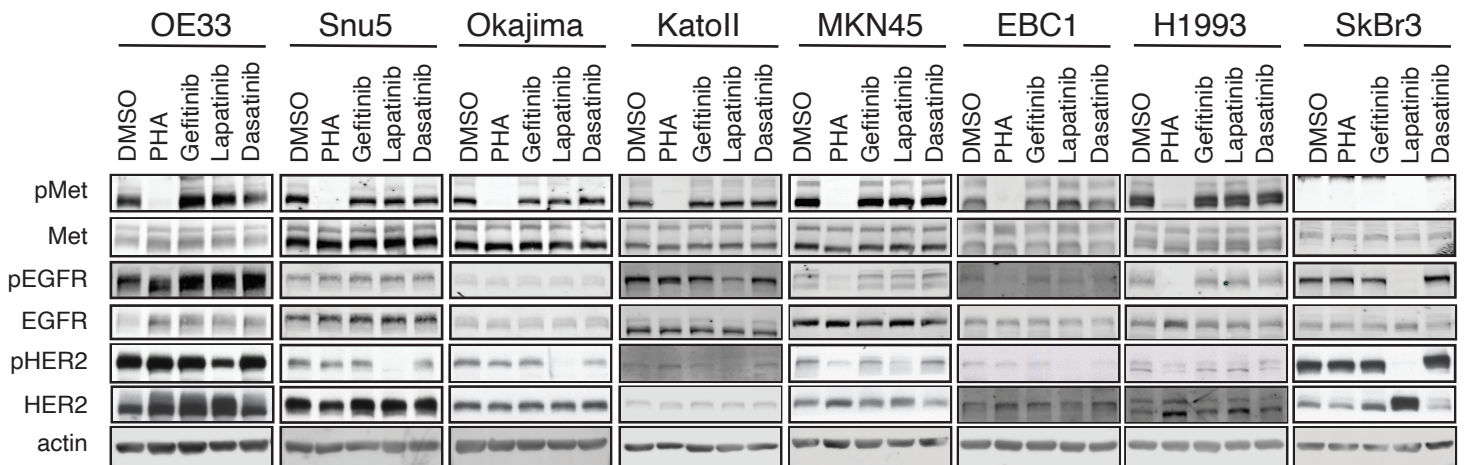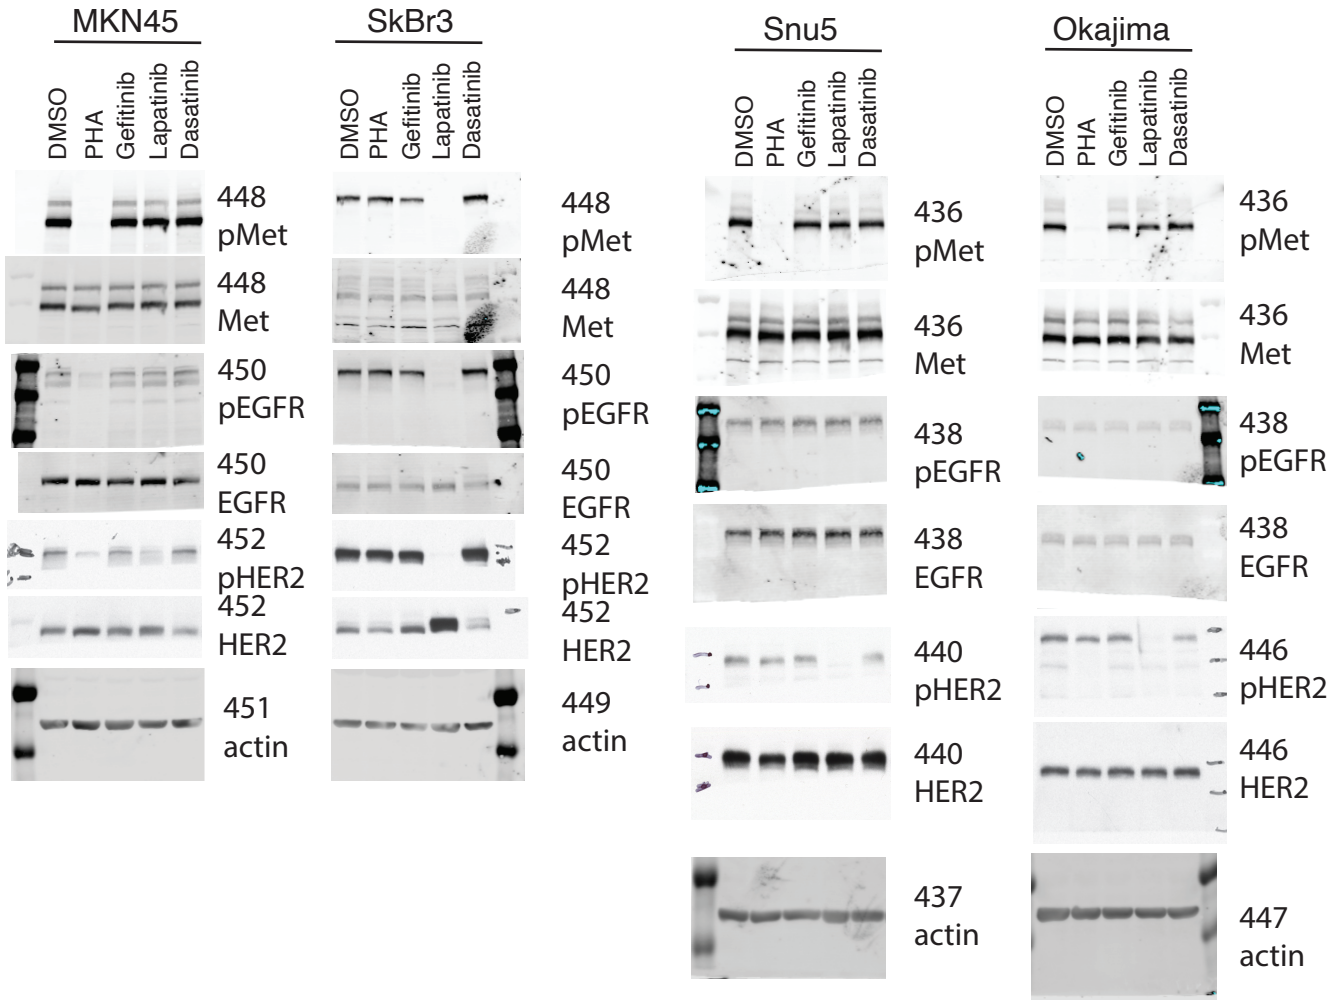

Supplementary Figure 1

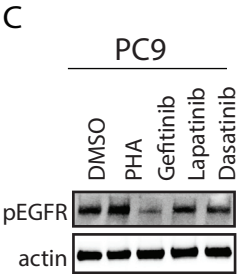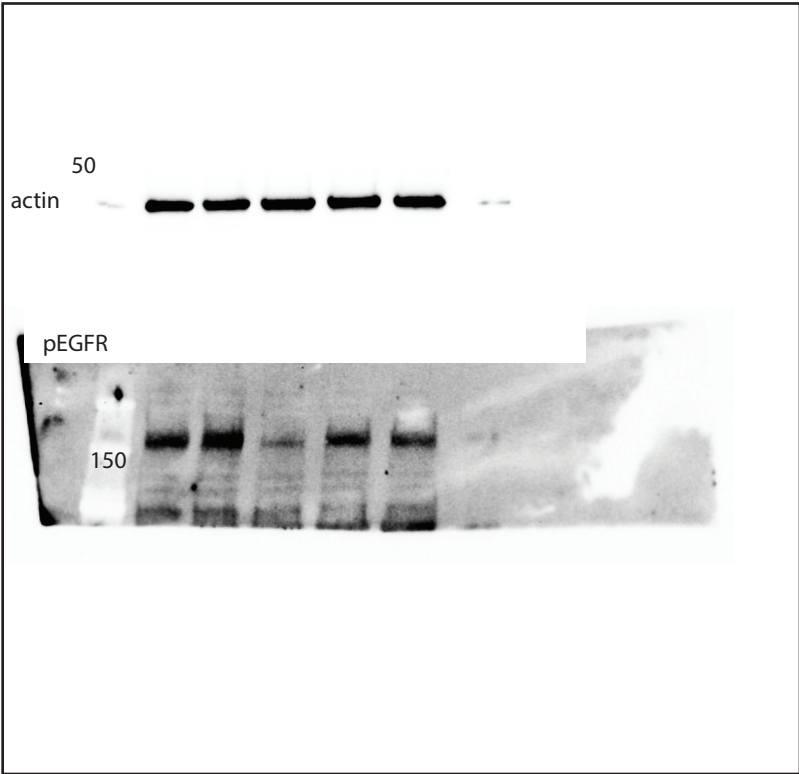

Figure S2

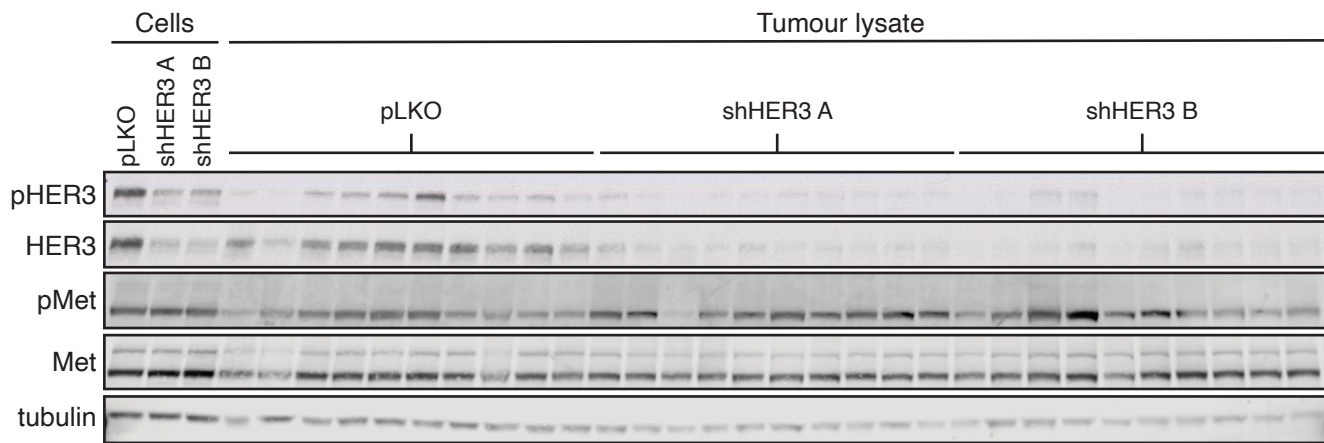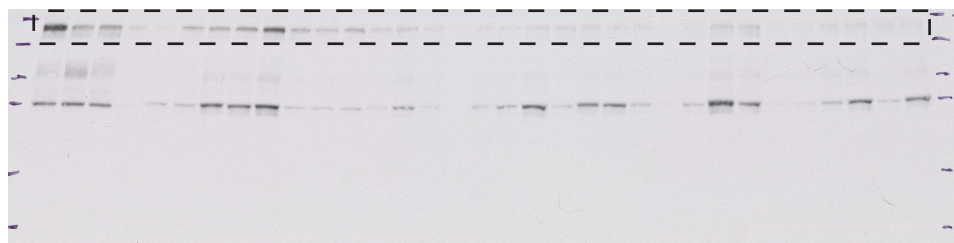

1373  
pHER3

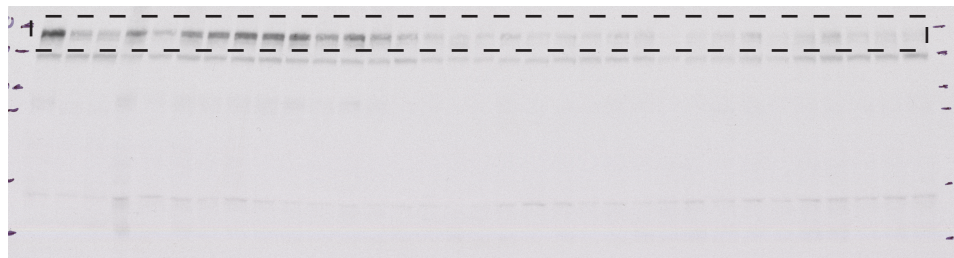

1373  
HER3

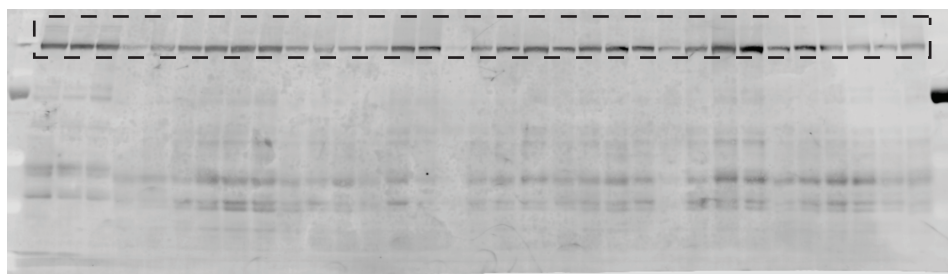

1374  
pMet

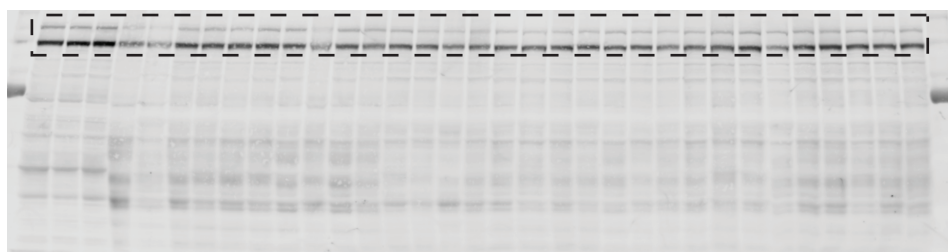

1374  
Met

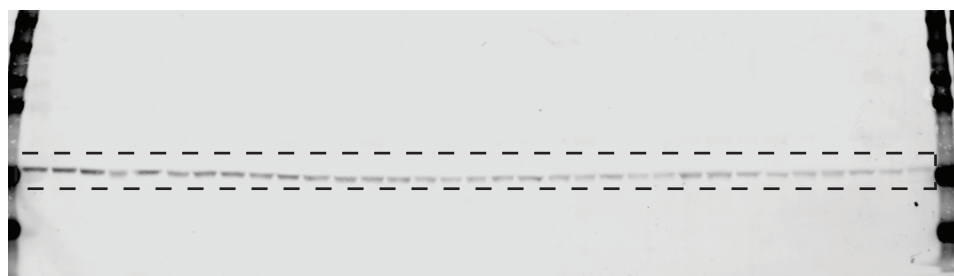

1373  
tubulin
